# Supplementary material
Source: publisher site journal article supplement (https://www.dovepress.com/get_supplementary_file.php?f=203661.xlsx)
Supplement: Supplementary file 1 [file get_supplementary_file.php]

## Sheet: Supp.Table 1
Supp. Table 1. Total number of VF genes identified in the 24 UPEC genome assemblies and coincidence between the identified VFs and the Prokka and RAST annotations.
Sample	Only found in VFDB gene alignment	Matching a feature annotated by Prokka and/or RAST	Total
EC010	16	168	184
EC011	18	174	192
EC013	17	134	151
EC022	11	156	167
EC025	9	157	166
EC037	10	160	170
EC047	16	181	197
EC053	8	158	166
EC067	12	175	187
EC084	14	162	176
EClOl	12	165	177
EC102	16	167	183
EC112	19	144	163
EC131	11	159	170
EC136	17	144	161
EC144	12	160	172
EC151	15	123	138
EC153	10	156	166
EC160	19	145	164
EC167	20	145	165
EC199	11	162	173
EC306	21	144	165
EC307	11	162	173
EC319	19	144	163

## Sheet: Supp.Table 2
Supp. Table 2. Types of VFs included under each functional category.
Adherence
Type-I fimbrae Afimbrial adhesin AFA-I CFA/I fimbriae
Adhesin involved in di use adherence (AIDA-I)
Curli fibers
Laminin-binding fimbriae (ELF) E. coli common pilus (ECP)
F1C fimbriae
F1845 fimbrial adhesin
F9 fimbriae
FdeC
Tia/Hek
Hemorrhagic E.coli pilus (HCP) P fimbriae
Pix pilus
S fimbriae
Stg fimbriae
Several putative adhesins
Iron Uptake
Enterobactin siderophore (and related functions)
Hemin uptake systems
Iron/managanease transport system
Salmochelin siderophore
Yersiniabactin siderophore
Motility and Chemotaxis
Che, Flg, Fli and Mot proteins, related to the biosynthesis, structural components and rotation of the peritrichous flagella as well as to the Chemotaxis cellular system
Secretion Systems
General Secretion Pathway
Type 6 Secretion System (T6SS)
ETT2 Gene Cluster, enconding a Type III Secretion System
A putative type II secretion protein. Several VFs whose genes belonged to the PAIs that code for Secretion Sysems (SS) were included in these functional category even if they were not annotated as structural or functional components of a SS
Toxins
Colicin/Colibactin
Shigella Enterotoxin 1 (ShET1)
Hemolysins
Cytotoxic necrotizing factor 2 Cnf2
Serine protease pic precursor Enterotoxin TieB
Secreted autotranspoter toxin Sat
Sat serine protease autotransporter protein
EspC Haemoglobin protease
Intra Host Survival
Outer membrane protein A OmpA
K1 capsule
Contact-dependent inhibition CDI system
Serine protease pic precursor (ShMu)
Invasion
Lipoprotein NlpI
Proteins YijP, AslA and Cation e lux system protein cusC related to the invasion of brain endothelial cells
Transcriptional Regulation
Several Proteins that regulate the transcription of the genes related to motility, chemotaxis, adherence, secretion, iron uptake, invasion and toxicity
Virulence Effectors
Several effector proteins secreted by the Type III Secretion System (TTSS) including the Mxi-Spa effectors controlled by MxiE, EspL1, EspX4, EspX5, EspX, EspR, EspL, EspY1, EspY2, EspY3 and EspY4
Tir domain containing protein TcpC
Unknown
10 of the VFDB genes aligned to the 26 studied genomes had no explicit function definition in the VFDB and the in- formation about them could not be found elsewhere

## Sheet: Supp. Table 3
Supp. Table 3. Genotype and phenotype of antibiotic resistance in UPEC strains (n=24)
Antibiotic	Genotype	No. of strians	Phenotype	No. of resistant strains
	aac(3)-IIa	8	Gentamycin	13
	aac(3)-IId	2	Amikacyn	6
Aminoglycoside	aadA1	1	Netilmicin	9
	aadA2	1
	aadA5	6
	aph(3´)-Ia	2
	strA	13
	strB	13
Fluoroquinolone	aac(6´)Ib-cr	8	Pefloxacin	19
	blaCMY-2	3	Cephalotin	24
	blaCMY-23	0	Ceftriaxone	12
Beta-lactamase	blaCTX-M-15	8	Ampicillin	24
	blaOXA-1	8	Cefotaxime	18
	blaTEM-1B	12	Carbenicillin	24
Macrolide	mph(A)	7	NT	NT
	catA1	2	Cloramphenicol	7
Phenicol	catB4	8
	flor	2
Tetracycline	tet(A)	11	NT	NT
	tet(B)	4
	sul1	8
Sulphonamide	sul2	13
	sul3	1
	dfrA1	1	Trimethoprim-sulfametoxazole	17
	dfrA12	1
Trimethoprim	dfrA17	7
	dfrA5	5
	dfrA8	1
	dfrB4	2

## Sheet: Supp.Table 4
Supp. Table 4. Occurrence of 349 VFDB annotated genes in the 24 UPEC genome assemblies and in two E. coli model strains. The table numbers indicate the identity of the sequence alignment. Manually annotated functions are color-coded																																Counts by phylogroyp					Counts by Serotype-ST combination
				Phylogenetic group			B2									B2	B2		B2	B1					B1	B1	A	D	D	-		B2	B1	A	D		B2	B2	B2	B2	B1	B1	B1	A	D	-
				Sequence type			ST-131									ST-131	ST-1193		ST-14	ST-423					ST-297	ST-3519	ST-10	ST-69	ST-69	ST-648							ST-131	ST-131	ST-1193	ST-14	ST-423	ST-297	ST-3519	ST-10	ST-69	ST-648
				Serotype	06:H1:K2		025:H4									016:H5	075:H5		075:H5	08:H9					045:H11	0116:H48	016:H4	NA	NA	01:H6		13	7	1	3		025:H4	016:H5	075:H5	075:H5	08:H9	045:H11	0116:H48	016:H4	NA	01:H6
				Total number of VFs	204	179	166	170	167	170	177	172	173	173	166	166	184	183	176	163	163	164	165	161	165	138	151	197	187	192
Ocurrence in the studied genomes	VFDB ID and NCBI GI or GB	VFDB Description	VFDB Gene symbol	Manually annotated Function	CFT073	EC958	EC153	EC037	EC022	EC131	EC101	EC144	EC307	EC199	EC025	EC053	EC010	EC102	EC084	EC112	EC319	EC160	EC167	EC136	EC306	EC151	EC013	EC047	EC067	EC011
26	VFG000927(gi:26246566)	ferric enterobactin transport protein FepE [Enterobactin (VF0228)] [Escherichia coli CFT073]	fepE	Iron Uptake	100	99.824	99.824	99.824	99.824	99.824	99.824	99.824	99.824	99.824	99.824	93.915	95.15	95.15	95.15	94.444	94.444	94.444	94.444	94.444	94.709	91.711	94.533	93.915	93.915	94.533		13	7	1	3		9	1	2	1	5	1	1	1	2	1
26	VFG012874(gi:30064027)	hypothetical protein [Mxi-Spa TTSS effectors controlled by MxiE (CVF465)] [Shigella flexneri 2a str. 2457T]	ipaH	Virulence effector	97.303	96.629	96.629	96.629	96.629	96.629	96.629	96.629	96.629	96.629	96.629	96.629	97.978	97.978	97.978	96.854	96.854	96.854	96.854	96.854	97.303	97.528	96.854	97.228	97.303	98.052		13	7	1	3		9	1	2	1	5	1	1	1	2	1
26	VFG012978(gi:74311131)	2,3-dihydro-2,3-dihydroxybenzoate dehydrogenase, enterochelin biosynthesis [Enterobactin synthesis (CVF477)] [Shigella sonnei Ss046]	entA	Iron Uptake	95.85	96.653	96.653	96.653	96.653	96.653	96.653	96.653	96.653	96.653	96.653	96.653	96.118	96.118	96.118	98.126	98.126	98.126	98.126	98.126	99.331	98.126	98.26	96.653	96.653	97.456		13	7	1	3		9	1	2	1	5	1	1	1	2	1
26	VFG013038(gi:74311124)	ferric enterobactin transport protein [Enterobactin transport (CVF478)] [Shigella sonnei Ss046]	fepG	Iron Uptake	94.763	94.26	94.26	94.26	94.26	94.26	94.26	94.26	94.26	94.26	94.26	94.058	94.663	94.663	94.663	97.885	97.885	97.885	97.885	97.885	98.187	97.281	96.979	96.878	96.878	96.677		13	7	1	3		9	1	2	1	5	1	1	1	2	1
26	VFG020170(gi:187732104)	isochorismatase [Enterobactin synthesis (CVF477)] [Shigella boydii CDC 3083-94]	entB	Iron Uptake	97.436	97.319	97.319	97.319	97.319	97.319	97.319	97.319	97.319	97.319	97.319	97.436	97.319	97.319	97.319	99.417	99.417	99.417	99.417	99.417	99.068	99.417	98.834	97.436	97.436	96.97		13	7	1	3		9	1	2	1	5	1	1	1	2	1
26	VFG020172(gi:187732369)	isochorismate synthase, entC [Enterobactin synthesis (CVF477)] [Shigella boydii CDC 3083-94]	entC	Iron Uptake	98.299	98.214	98.129	98.129	98.129	98.129	98.214	98.214	98.214	98.214	98.214	98.384	98.299	98.299	98.299	98.469	98.469	98.469	98.469	98.469	98.554	98.554	98.724	97.704	97.704	98.214		13	7	1	3		9	1	2	1	5	1	1	1	2	1
26	VFG020175(gi:187732669)	outer membrane receptor FepA [Enterobactin transport (CVF478)] [Shigella boydii CDC 3083-94]	fepA	Iron Uptake	96.921	96.519	96.519	96.519	96.519	96.519	96.519	96.519	96.519	96.519	96.519	96.609	96.653	96.653	96.653	97.813	97.813	97.813	97.813	97.813	98.483	98.438	96.653	95.805	95.805	97.01		13	7	1	3		9	1	2	1	5	1	1	1	2	1
26	VFG020176(gi:187732007)	iron-enterobactin transporter periplasmic binding protein [Enterobactin transport (CVF478)] [Shigella boydii CDC 3083-94]	fepB	Iron Uptake	97.597	97.283	97.283	97.283	97.283	97.283	97.283	97.283	97.283	97.283	97.283	97.492	97.597	97.597	97.597	97.91	97.91	97.91	97.91	97.91	98.015	98.224	96.761	97.179	97.179	98.119		13	7	1	3		9	1	2	1	5	1	1	1	2	1
26	VFG020177(gi:187733815)	iron-enterobactin transporter ATP-binding protein [Enterobactin transport (CVF478)] [Shigella boydii CDC 3083-94]	fepC	Iron Uptake	96.814	97.059	97.059	97.059	97.059	97.059	97.059	97.059	97.059	97.059	97.059	97.059	96.324	96.324	96.201	97.917	97.917	97.917	97.917	97.917	99.632	97.917	98.039	95.343	95.343	96.446		13	7	1	3		9	1	2	1	5	1	1	1	2	1
26	VFG020178(gi:187731084)	iron-enterobactin transporter membrane protein [Enterobactin transport (CVF478)] [Shigella boydii CDC 3083-94]	fepD	Iron Uptake	95.92	96.318	96.318	96.318	96.318	96.318	96.318	96.318	96.318	96.318	96.318	96.318	95.821	95.821	95.92	98.507	98.507	98.507	98.507	98.507	98.109	98.408	97.91	97.313	97.313	97.114		13	7	1	3		9	1	2	1	5	1	1	1	2	1
26	VFG033196(gi:387615046)	tyrosine recombinase/inversion of on/off regulator of fimA [Type I fimbriae (CVF426)] [Escherichia coli O78:H11:K80 str. H10407]	fimE	Adherence	98.66	98.492	98.492	98.492	98.492	98.492	98.492	98.492	98.492	98.492	98.492	98.492	98.325	98.325	98.325	98.827	98.827	98.827	98.827	98.827	98.492	98.66	98.325	98.325	98.325	98.325		13	7	1	3		9	1	2	1	5	1	1	1	2	1
26	VFG033249(gi:387619673)	FimI fimbrial protein [Type I fimbriae (CVF426)] [Escherichia coli O83:H1 str. NRG 857C]	fimI	Adherence	99.218	98.592	98.592	98.592	98.592	98.592	98.592	98.592	98.592	98.592	98.592	98.592	98.592	98.592	98.592	98.748	98.748	98.748	98.748	98.748	99.218	98.905	98.592	98.592	98.592	98.592		13	7	1	3		9	1	2	1	5	1	1	1	2	1
26	VFG033267(gi:443615871)	chaperone FimC, periplasmic [Type I fimbriae (CVF426)] [Escherichia coli O78:H18 str. WS3294A]	fimC	Adherence	98.209	99.311	99.311	99.311	99.311	99.311	99.311	99.311	99.311	99.311	99.311	99.036	98.898	98.898	98.898	99.587	99.587	99.587	99.587	99.587	98.76	98.898	98.898	98.898	98.898	98.898		13	7	1	3		9	1	2	1	5	1	1	1	2	1
26	VFG033322(gi:443615873)	minor component of type 1 fimbriae [Type I fimbriae (CVF426)] [Escherichia coli O78:H18 str. WS3294A]	fimF	Adherence	97.74	98.117	98.117	98.117	98.117	98.117	98.117	98.117	98.117	98.117	98.117	97.928	97.74	97.74	97.74	97.363	97.363	97.363	97.363	97.363	98.117	98.117	97.552	97.74	97.74	97.74		13	7	1	3		9	1	2	1	5	1	1	1	2	1
26	VFG033346(gi:387615052)	minor component of type 1 fimbriae [Type I fimbriae (CVF426)] [Escherichia coli O78:H11:K80 str. H10407]	fimG	Adherence	98.214	99.206	99.206	99.206	99.206	99.206	99.206	99.206	99.206	99.206	99.206	100	98.81	98.81	98.81	98.611	98.611	98.611	98.611	98.611	99.008	99.008	98.81	98.611	98.611	98.611		13	7	1	3		9	1	2	1	5	1	1	1	2	1
26	VFG033376(gi:387619678)	type 1 fimbiral adhesin FimH [Type I fimbriae (CVF426)] [Escherichia coli O83:H1 str. NRG 857C]	fimH	Adherence	99.225	98.007	98.007	98.007	98.007	98.007	98.007	98.007	98.007	98.007	98.007	97.896	97.674	97.674	97.785	97.674	97.674	97.674	97.674	97.674	97.785	97.674	97.785	97.785	97.785	97.785		13	7	1	3		9	1	2	1	5	1	1	1	2	1
26	VFG036063(gi:222155972)	truncated hemolysin E [Hemolysin/cytolysin A (CVF750)] [Escherichia coli O83:H1 str. LF82]	hlyE/clyA	Toxin	97.872	97.518	97.518	97.518	97.518	97.518	97.518	97.518	97.518	97.518	97.518	97.518	98.227	98.227	98.227	97.872	97.872	97.872	97.872	97.872	96.809	96.809	97.163	98.227	98.227	98.227		13	7	1	3		9	1	2	1	5	1	1	1	2	1
26	VFG042716(gi:15801634)	putative fimbrial-like protein [F9 fimbriae (AI090)] [Escherichia coli O157:H7 str. EDL933]	Z2204	Adherence	97.363	97.552	97.552	97.552	97.552	97.552	97.552	97.552	97.552	97.552	97.552	97.74	97.175	97.175	97.175	99.623	99.623	99.623	99.623	99.623	98.682	99.623	98.682	98.87	98.87	98.117		13	7	1	3		9	1	2	1	5	1	1	1	2	1
26	VFG042717(gi:15801635)	putative fimbrial-like protein [F9 fimbriae (AI090)] [Escherichia coli O157:H7 str. EDL933]	Z2205	Adherence	97.817	98.016	98.016	98.016	98.016	98.016	98.016	98.016	98.016	98.016	98.016	98.214	97.619	97.619	97.239	99.206	99.206	99.206	99.206	99.206	98.81	99.206	98.81	99.008	99.008	98.214		13	7	1	3		9	1	2	1	5	1	1	1	2	1
26	VFG043072(gi:15801187)	flagella synthesis protein FlgN [peritrichous flagella (AI140)] [Escherichia coli O157:H7 str. EDL933]	flgN	Motility and Chemotaxis	98.321	98.561	98.561	98.561	98.561	98.561	98.561	98.561	98.561	98.561	98.561	98.561	97.842	97.842	97.842	98.561	98.561	98.561	98.561	98.561	98.321	98.561	98.801	97.362	97.362	98.561		13	7	1	3		9	1	2	1	5	1	1	1	2	1
26	VFG043073(gi:15801189)	flagellar basal body P-ring biosynthesis protein FlgA [peritrichous flagella (AI140)] [Escherichia coli O157:H7 str. EDL933]	flgA	Motility and Chemotaxis	96.97	96.818	96.818	96.818	96.818	96.818	96.818	96.818	96.818	96.818	96.818	96.818	96.667	96.667	96.515	97.879	97.879	97.879	97.879	97.879	97.273	97.121	96.97	97.727	97.727	97.121		13	7	1	3		9	1	2	1	5	1	1	1	2	1
26	VFG043074(gi:15801190)	flagellar basal body rod protein FlgB [peritrichous flagella (AI140)] [Escherichia coli O157:H7 str. EDL933]	flgB	Motility and Chemotaxis	98.801	99.041	99.041	99.041	99.041	99.041	99.041	99.041	99.041	99.041	99.041	99.041	98.561	98.561	98.561	99.041	99.041	99.041	99.041	99.041	99.281	99.52	99.52	99.52	99.52	99.52		13	7	1	3		9	1	2	1	5	1	1	1	2	1
26	VFG043075(gi:15801191)	flagellar basal body rod protein FlgC [peritrichous flagella (AI140)] [Escherichia coli O157:H7 str. EDL933]	flgC	Motility and Chemotaxis	98.025	98.272	98.272	98.272	98.272	98.272	98.272	98.272	98.272	98.272	98.272	98.272	98.272	98.272	98.272	99.012	99.012	99.012	99.012	99.012	98.519	98.765	99.506	99.012	99.012	97.778		13	7	1	3		9	1	2	1	5	1	1	1	2	1
26	VFG043076(gi:15801192)	flagellar basal body rod modification protein [peritrichous flagella (AI140)] [Escherichia coli O157:H7 str. EDL933]	flgD	Motility and Chemotaxis	96.695	96.552	96.552	96.552	96.552	96.552	96.552	96.552	96.552	96.552	96.552	96.552	96.552	96.552	96.552	99.282	99.282	99.282	99.282	99.282	98.851	98.994	99.138	98.563	98.563	96.839		13	7	1	3		9	1	2	1	5	1	1	1	2	1
26	VFG043077(gi:15801193)	flagellar hook protein FlgE [peritrichous flagella (AI140)] [Escherichia coli O157:H7 str. EDL933]	flgE	Motility and Chemotaxis	98.01	97.512	97.512	97.512	97.512	97.512	97.512	97.512	97.512	97.512	97.512	97.512	96.935	96.935	96.935	98.426	98.426	98.426	98.426	98.426	98.426	98.509	95.14	97.927	97.927	96.683		13	7	1	3		9	1	2	1	5	1	1	1	2	1
26	VFG043078(gi:15801194)	flagellar basal body rod protein FlgF [peritrichous flagella (AI140)] [Escherichia coli O157:H7 str. EDL933]	flgF	Motility and Chemotaxis	97.751	97.751	97.751	97.751	97.751	97.751	97.751	97.751	97.751	97.751	97.751	97.751	97.354	97.354	97.354	98.677	98.677	98.677	98.677	98.677	98.148	98.545	96.561	98.413	98.413	98.413		13	7	1	3		9	1	2	1	5	1	1	1	2	1
26	VFG043079(gi:15801195)	flagellar basal body rod protein FlgG [peritrichous flagella (AI140)] [Escherichia coli O157:H7 str. EDL933]	flgG	Motility and Chemotaxis	98.212	97.957	97.957	97.957	97.957	97.957	97.957	97.957	97.957	97.957	97.957	98.212	98.723	98.723	98.723	98.851	98.851	98.851	98.851	98.851	99.234	99.489	99.361	98.212	98.212	98.467		13	7	1	3		9	1	2	1	5	1	1	1	2	1
26	VFG043080(gi:15801196)	flagellar basal body L-ring protein [peritrichous flagella (AI140)] [Escherichia coli O157:H7 str. EDL933]	flgH	Motility and Chemotaxis	98.426	98.426	98.426	98.426	98.426	98.426	98.426	98.426	98.426	98.426	98.426	98.426	98.283	98.283	98.426	98.999	98.999	98.999	98.999	98.999	99.571	99.285	99.571	98.569	98.569	98.569		13	7	1	3		9	1	2	1	5	1	1	1	2	1
26	VFG043081(gi:15801197)	flagellar basal body P-ring protein [peritrichous flagella (AI140)] [Escherichia coli O157:H7 str. EDL933]	flgI	Motility and Chemotaxis	96.903	96.448	96.448	96.448	96.448	96.448	96.448	96.448	96.448	96.448	96.448	96.448	96.63	96.63	96.63	97.814	97.814	97.814	97.814	97.814	97.814	97.268	97.177	96.175	96.175	96.903		13	7	1	3		9	1	2	1	5	1	1	1	2	1
26	VFG043082(gi:15801198)	flagellar rod assembly protein/muramidase FlgJ [peritrichous flagella (AI140)] [Escherichia coli O157:H7 str. EDL933]	flgJ	Motility and Chemotaxis	97.452	98.301	98.301	98.301	98.301	98.301	98.301	98.301	98.301	98.301	98.301	98.301	97.771	97.771	97.771	98.195	98.195	98.195	98.195	98.195	97.983	98.514	98.301	97.877	97.877	97.877		13	7	1	3		9	1	2	1	5	1	1	1	2	1
26	VFG043083(gi:15801199)	flagellar hook-associated protein FlgK [peritrichous flagella (AI140)] [Escherichia coli O157:H7 str. EDL933]	flgK	Motility and Chemotaxis	97.749	97.993	97.993	97.993	97.993	97.993	97.993	97.993	97.993	97.993	97.993	97.993	97.384	97.384	97.384	98.418	98.418	98.418	98.418	98.418	98.358	98.601	98.479	97.871	97.871	97.81		13	7	1	3		9	1	2	1	5	1	1	1	2	1
26	VFG043084(gi:15801200)	flagellar hook-associated protein FlgL [peritrichous flagella (AI140)] [Escherichia coli O157:H7 str. EDL933]	flgL	Motility and Chemotaxis	97.904	96.646	96.646	96.646	96.646	96.646	96.646	96.646	96.646	96.646	96.646	96.646	98.323	98.323	98.323	98.637	98.637	98.637	98.637	98.637	97.065	98.008	96.646	96.855	96.855	96.541		13	7	1	3		9	1	2	1	5	1	1	1	2	1
26	VFG043087(gi:15802292)	flagellar biosynthesis protein FlhB [peritrichous flagella (AI140)] [Escherichia coli O157:H7 str. EDL933]	flhB	Motility and Chemotaxis	98.52	98.085	98.085	98.085	98.085	98.085	98.085	98.085	98.085	98.085	98.085	97.911	98.346	98.346	98.346	98.433	98.433	98.433	98.433	98.433	98.869	98.433	98.346	98.172	96.867	97.824		13	7	1	3		9	1	2	1	5	1	1	1	2	1
26	VFG043088(gi:15802293)	chemotaxis regulator CheZ [peritrichous flagella (AI140)] [Escherichia coli O157:H7 str. EDL933]	cheZ	Motility and Chemotaxis	98.45	98.295	98.295	98.295	98.295	98.295	98.295	98.295	98.295	98.295	98.295	98.76	98.605	98.605	98.605	99.38	99.38	99.38	99.38	99.38	99.38	99.38	99.38	98.76	98.915	98.915		13	7	1	3		9	1	2	1	5	1	1	1	2	1
26	VFG043089(gi:15802294)	chemotaxis regulatory protein CheY [peritrichous flagella (AI140)] [Escherichia coli O157:H7 str. EDL933]	cheY	Motility and Chemotaxis	98.718	99.231	99.231	99.231	99.231	99.231	99.231	99.231	99.231	99.231	99.231	99.231	98.718	98.718	98.718	99.231	99.231	99.231	99.231	99.231	99.231	99.231	99.231	98.974	98.718	99.487		13	7	1	3		9	1	2	1	5	1	1	1	2	1
26	VFG043090(gi:15802295)	chemotaxis-specific methylesterase [peritrichous flagella (AI140)] [Escherichia coli O157:H7 str. EDL933]	cheB	Motility and Chemotaxis	97.048	96.952	96.952	96.952	96.952	96.952	96.952	96.952	96.952	96.952	96.952	96.952	96.857	96.857	96.857	98.667	98.667	98.667	98.667	98.667	98.667	98.667	98.667	98.381	97.905	97.524		13	7	1	3		9	1	2	1	5	1	1	1	2	1
26	VFG043091(gi:15802296)	chemotaxis methyltransferase CheR [peritrichous flagella (AI140)] [Escherichia coli O157:H7 str. EDL933]	cheR	Motility and Chemotaxis	98.258	98.026	98.026	98.026	98.026	98.026	98.026	98.026	98.026	98.026	98.026	97.909	98.026	98.026	98.026	99.303	99.303	99.303	99.303	99.303	99.187	99.187	99.419	98.374	97.096	98.606		13	7	1	3		9	1	2	1	5	1	1	1	2	1
26	VFG043092(gi:15802298)	methyl-accepting chemotaxis protein II [peritrichous flagella (AI140)] [Escherichia coli O157:H7 str. EDL933]	tar/cheM	Motility and Chemotaxis	98.075	98.014	98.014	98.014	98.014	98.014	98.014	98.014	98.014	98.014	98.014	98.315	98.075	98.075	98.075	98.375	98.375	98.375	98.375	98.375	98.375	98.255	98.255	98.135	98.195	98.014		13	7	1	3		9	1	2	1	5	1	1	1	2	1
26	VFG043093(gi:15802299)	purine-binding chemotaxis protein [peritrichous flagella (AI140)] [Escherichia coli O157:H7 str. EDL933]	cheW	Motility and Chemotaxis	98.016	98.016	98.016	98.016	98.016	98.016	98.016	98.016	98.016	98.016	98.016	98.016	98.016	98.016	98.016	98.81	98.81	98.81	98.81	98.81	98.81	98.81	98.81	98.81	98.611	98.413		13	7	1	3		9	1	2	1	5	1	1	1	2	1
26	VFG043094(gi:15802300)	chemotaxis protein CheA [peritrichous flagella (AI140)] [Escherichia coli O157:H7 str. EDL933]	cheA	Motility and Chemotaxis	97.659	97.812	97.761	97.761	97.761	97.761	97.812	97.812	97.812	97.812	97.812	97.812	97.659	97.659	97.608	98.728	98.728	98.728	98.728	98.728	98.677	98.779	98.677	98.015	98.321	98.422		13	7	1	3		9	1	2	1	5	1	1	1	2	1
26	VFG043095(gi:15802301)	flagellar motor protein MotB [peritrichous flagella (AI140)] [Escherichia coli O157:H7 str. EDL933]	motB	Motility and Chemotaxis	97.195	97.303	97.303	97.303	97.303	97.303	97.303	97.303	97.303	97.303	97.303	97.411	97.735	97.735	97.735	97.843	97.843	97.843	97.843	97.843	97.843	97.843	97.735	97.087	97.843	97.519		13	7	1	3		9	1	2	1	5	1	1	1	2	1
26	VFG043096(gi:15802302)	flagellar motor protein MotA [peritrichous flagella (AI140)] [Escherichia coli O157:H7 str. EDL933]	motA	Motility and Chemotaxis	98.536	98.198	98.198	98.198	98.198	98.198	98.198	98.198	98.198	98.198	98.198	98.311	98.311	98.311	98.311	99.099	99.099	99.099	99.099	99.099	98.986	99.099	99.212	98.649	98.874	98.874		13	7	1	3		9	1	2	1	5	1	1	1	2	1
26	VFG043097(gi:15802303)	transcriptional activator FlhC [peritrichous flagella (AI140)] [Escherichia coli O157:H7 str. EDL933]	flhC	Transcriptional Regulation	98.618	98.446	98.446	98.446	98.446	98.446	98.446	98.446	98.446	98.446	98.446	98.618	98.791	98.791	98.791	99.482	99.482	99.482	99.482	99.482	98.964	99.482	98.964	98.446	99.655	98.446		13	7	1	3		9	1	2	1	5	1	1	1	2	1
26	VFG043098(gi:15802304)	transcriptional activator FlhD [peritrichous flagella (AI140)] [Escherichia coli O157:H7 str. EDL933]	flhD	Transcriptional Regulation	98.889	99.167	99.167	99.167	99.167	99.167	99.167	99.167	99.167	99.167	99.167	99.167	99.167	99.167	99.167	98.889	98.889	98.889	98.889	98.889	99.722	98.889	98.333	98.333	99.722	98.889		13	7	1	3		9	1	2	1	5	1	1	1	2	1
26	VFG043099(gi:15802355)	cystine transporter subunit [peritrichous flagella (AI140)] [Escherichia coli O157:H7 str. EDL933]	fliY	Motility and Chemotaxis	97.628	97.628	97.628	97.628	97.628	97.628	97.628	97.628	97.628	97.628	97.628	97.503	97.753	97.753	97.753	97.378	97.378	97.378	97.378	97.378	98.252	98.002	98.252	97.753	97.628	97.503		13	7	1	3		9	1	2	1	5	1	1	1	2	1
26	VFG043100(gi:15802356)	flagella biosynthesis protein FliZ [peritrichous flagella (AI140)] [Escherichia coli O157:H7 str. EDL933]	fliZ	Motility and Chemotaxis	98.469	98.129	98.129	98.129	98.129	98.129	98.129	98.129	98.129	98.129	98.129	97.619	97.959	97.959	97.959	98.129	98.129	98.129	98.129	98.129	98.129	97.789	98.129	98.129	97.959	97.789		13	7	1	3		9	1	2	1	5	1	1	1	2	1
26	VFG043101(gi:15802357)	flagellar biosynthesis sigma factor [peritrichous flagella (AI140)] [Escherichia coli O157:H7 str. EDL933]	fliA	Motility and Chemotaxis	98.889	99.028	99.028	99.028	99.028	99.028	99.028	99.028	99.028	99.028	99.028	98.75	98.75	98.75	98.75	98.611	98.611	98.611	98.611	98.611	98.889	99.028	98.889	98.611	98.75	98.194		13	7	1	3		9	1	2	1	5	1	1	1	2	1
26	VFG043105(gi:15802361)	flagellar biosynthesis protein FliT [peritrichous flagella (AI140)] [Escherichia coli O157:H7 str. EDL933]	fliT	Motility and Chemotaxis	97.268	97.268	97.268	97.268	97.268	97.268	97.268	97.268	97.268	97.268	97.268	97.268	97.268	97.268	97.268	98.087	98.087	98.087	98.087	98.087	97.268	98.907	96.995	97.268	97.541	96.721		13	7	1	3		9	1	2	1	5	1	1	1	2	1
26	VFG043106(gi:15802372)	flagellar hook-basal body protein FliE [peritrichous flagella (AI140)] [Escherichia coli O157:H7 str. EDL933]	fliE	Motility and Chemotaxis	97.46	97.778	97.778	97.778	97.778	97.778	97.778	97.778	97.778	97.778	97.778	97.143	97.46	97.46	97.46	96.825	96.825	96.825	96.825	96.825	97.143	96.825	96.19	96.508	98.095	96.508		13	7	1	3		9	1	2	1	5	1	1	1	2	1
26	VFG043107(gi:15802373)	flagellar MS-ring protein [peritrichous flagella (AI140)] [Escherichia coli O157:H7 str. EDL933]	fliF	Motility and Chemotaxis	98.011	97.77	97.77	97.77	97.77	97.77	97.77	97.77	97.77	97.77	97.77	97.951	97.951	97.951	97.951	98.674	98.674	98.674	98.674	98.674	98.794	98.734	97.951	98.011	98.131	98.433		13	7	1	3		9	1	2	1	5	1	1	1	2	1
26	VFG043108(gi:15802374)	flagellar motor switch protein G [peritrichous flagella (AI140)] [Escherichia coli O157:H7 str. EDL933]	fliG	Motility and Chemotaxis	98.795	98.594	98.594	98.594	98.594	98.594	98.594	98.594	98.594	98.594	98.594	98.795	98.695	98.695	98.695	99.197	99.197	99.197	99.197	99.197	99.096	99.197	99.197	99.197	98.193	98.394		13	7	1	3		9	1	2	1	5	1	1	1	2	1
26	VFG043109(gi:161367588)	flagellar assembly protein H [peritrichous flagella (AI140)] [Escherichia coli O157:H7 str. EDL933]	fliH	Motility and Chemotaxis	96.361	96.652	96.652	96.652	96.652	96.652	96.652	96.652	96.652	96.652	96.652	96.361	97.525	97.525	97.525	97.817	97.817	97.817	97.817	97.817	98.108	97.962	98.108	98.108	98.108	97.525		13	7	1	3		9	1	2	1	5	1	1	1	2	1
26	VFG043110(gi:161367587)	flagellum-specific ATP synthase [peritrichous flagella (AI140)] [Escherichia coli O157:H7 str. EDL933]	fliI	Motility and Chemotaxis	98.108	98.035	98.035	98.035	98.035	98.035	98.035	98.035	98.035	98.035	98.035	98.035	98.035	98.035	98.035	98.326	98.326	98.326	98.326	98.326	98.253	98.326	98.763	98.763	97.889	97.598		13	7	1	3		9	1	2	1	5	1	1	1	2	1
26	VFG043111(gi:15802377)	flagellar biosynthesis chaperone [peritrichous flagella (AI140)] [Escherichia coli O157:H7 str. EDL933]	fliJ	Motility and Chemotaxis	98.874	99.55	99.55	99.55	99.55	99.55	99.55	99.55	99.55	99.55	99.55	98.649	98.649	98.649	98.649	100	100	100	100	100	100	100	99.099	99.099	99.324	98.874		13	7	1	3		9	1	2	1	5	1	1	1	2	1
26	VFG043112(gi:15802378)	flagellar hook-length control protein [peritrichous flagella (AI140)] [Escherichia coli O157:H7 str. EDL933]	fliK	Motility and Chemotaxis	97.163	97.606	97.606	97.606	97.606	97.606	97.606	97.606	97.606	97.606	97.606	97.429	97.163	97.163	96.986	97.252	97.252	97.252	97.252	97.252	97.163	97.34	97.163	97.163	97.784	96.543		13	7	1	3		9	1	2	1	5	1	1	1	2	1
26	VFG043113(gi:15802379)	flagellar basal body-associated protein FliL [peritrichous flagella (AI140)] [Escherichia coli O157:H7 str. EDL933]	fliL	Motility and Chemotaxis	98.495	98.495	98.495	98.495	98.495	98.495	98.495	98.495	98.495	98.495	98.495	98.495	99.14	99.14	99.14	99.14	99.14	99.14	99.14	99.14	98.71	98.495	98.71	99.14	99.14	99.14		13	7	1	3		9	1	2	1	5	1	1	1	2	1
26	VFG043114(gi:15802380)	flagellar motor switch protein FliM [peritrichous flagella (AI140)] [Escherichia coli O157:H7 str. EDL933]	fliM	Motility and Chemotaxis	98.408	98.01	98.01	98.01	98.01	98.01	98.01	98.01	98.01	98.01	98.01	98.209	98.408	98.408	98.408	98.408	98.408	98.408	98.408	98.408	99.204	98.408	99.005	99.104	98.408	98.109		13	7	1	3		9	1	2	1	5	1	1	1	2	1
26	VFG043115(gi:15802381)	flagellar motor switch protein FliN [peritrichous flagella (AI140)] [Escherichia coli O157:H7 str. EDL933]	fliN	Motility and Chemotaxis	96.86	95.652	95.652	95.652	95.652	95.652	95.652	95.652	95.652	95.652	95.652	95.652	96.618	96.618	96.618	98.551	98.551	98.551	98.551	98.551	98.792	98.792	98.551	98.551	96.618	96.86		13	7	1	3		9	1	2	1	5	1	1	1	2	1
26	VFG043116(gi:161367586)	flagellar biosynthesis protein FliO [peritrichous flagella (AI140)] [Escherichia coli O157:H7 str. EDL933]	fliO	Motility and Chemotaxis	98.087	97.541	97.541	97.541	97.541	97.541	97.541	97.541	97.541	97.541	97.541	97.814	98.087	98.087	98.087	98.907	98.907	98.907	98.907	98.907	98.361	98.907	98.907	98.907	98.087	98.634		13	7	1	3		9	1	2	1	5	1	1	1	2	1
26	VFG043117(gi:15802383)	flagellar biosynthesis protein FliP [peritrichous flagella (AI140)] [Escherichia coli O157:H7 str. EDL933]	fliP	Motility and Chemotaxis	97.832	97.425	97.425	97.425	97.425	97.425	97.425	97.425	97.425	97.425	97.425	97.967	97.696	97.696	97.696	98.78	98.78	98.78	98.78	98.78	97.696	98.645	98.916	98.916	98.374	98.238		13	7	1	3		9	1	2	1	5	1	1	1	2	1
26	VFG043118(gi:15802384)	flagellar biosynthesis protein FliQ [peritrichous flagella (AI140)] [Escherichia coli O157:H7 str. EDL933]	fliQ	Motility and Chemotaxis	97.407	97.037	97.037	97.037	97.037	97.037	97.037	97.037	97.037	97.037	97.037	97.037	97.407	97.407	97.407	98.889	98.889	98.889	98.889	98.889	97.407	99.259	97.778	97.778	98.519	98.889		13	7	1	3		9	1	2	1	5	1	1	1	2	1
26	VFG043119(gi:15802385)	flagellar biosynthesis protein FliR [peritrichous flagella (AI140)] [Escherichia coli O157:H7 str. EDL933]	fliR	Motility and Chemotaxis	97.328	97.455	97.455	97.455	97.455	97.455	97.455	97.455	97.455	97.455	97.455	97.455	97.328	97.328	97.328	97.328	97.328	97.328	97.328	97.328	97.201	97.71	98.092	98.092	96.947	97.837		13	7	1	3		9	1	2	1	5	1	1	1	2	1
26	VFG043545(gi:218560235)	lipoprotein NlpI [NlpI (AI331)] [Escherichia coli O45:K1:H7 str. S88]	ECS88_3547	Invasion	99.887	99.774	99.774	99.774	99.774	99.774	99.774	99.774	99.774	99.774	99.774	99.774	99.887	99.887	99.774	99.774	99.774	99.774	99.774	99.774	99.774	99.774	99.661	99.661	99.661	99.661		13	7	1	3		9	1	2	1	5	1	1	1	2	1
26	VFG044159(gb|NP_752602)	enterobactin/ferric enterobactin esterase [enterobactin (IA019)] [Escherichia coli CFT073]	fes	Iron Uptake	100	99.002	99.002	99.002	99.002	99.002	99.002	99.002	99.002	98.919	99.002	99.169	99.834	99.834	99.834	96.426	96.426	96.426	96.426	96.426	96.758	96.509	96.675	96.758	96.758	97.095		13	7	1	3		9	1	2	1	5	1	1	1	2	1
26	VFG044165(gb|NP_752609)	enterobactin exporter, iron-regulated [enterobactin (IA019)] [Escherichia coli CFT073]	entS	Iron Uptake	100	97.442	97.442	97.442	97.442	97.442	97.442	97.442	97.442	97.442	97.442	98.321	98.801	98.801	98.801	95.763	95.763	95.763	95.763	95.763	95.843	95.683	95.444	95.843	95.843	96.323		13	7	1	3		9	1	2	1	5	1	1	1	2	1
26	VFG045770	protein YijP [Invasion of brain endothelial cells (Ibes) (CVF429)] [Escherichia coli O25b:H4-ST131]	yijP	Invasion	99.494	100	100	100	100	100	100	100	100	100	100	100	99.438	99.438	99.438	96.515	96.515	96.515	96.515	96.515	96.908	97.302	97.414	97.47	97.47	96.74		13	7	1	3		9	1	2	1	5	1	1	1	2	1
26	VFG045773	type 1 fimbriae regulatory protein FimB [Type I fimbriae (CVF426)] [Escherichia coli O25b:H4-ST131]	fimB'	Adherence	98.039	100	100	100	100	100	100	100	100	100	100	100	99.02	99.02	99.02	99.02	99.02	99.02	99.02	99.02	100	99.265	99.02	99.02	99.02	99.02		13	7	1	3		9	1	2	1	5	1	1	1	2	1
26	VFG045972	Prepilin peptidase-dependent protein D [Hemorrhagic E.coli pilus (HCP) (CVF825)] [Escherichia coli O83:H1 str. LF82]	ppdD	Adherence	96.599	96.599	96.599	96.599	96.599	96.599	96.599	96.599	96.599	96.599	96.599	96.599	97.506	97.506	97.506	96.825	96.825	96.825	96.825	96.825	96.825	97.052	97.052	97.506	97.506	96.825		13	7	1	3		9	1	2	1	5	1	1	1	2	1
26	VFG046009	Protein transport protein hofB [Hemorrhagic E.coli pilus (HCP) (CVF825)] [Escherichia coli O83:H1 str. LF82]	hofB	Adherence	99.639	99.495	99.495	99.495	99.495	99.495	99.495	99.495	99.495	99.495	99.495	99.567	99.567	99.567	99.495	96.825	96.825	96.825	96.825	96.825	97.763	97.475	97.475	96.681	96.681	97.114		13	7	1	3		9	1	2	1	5	1	1	1	2	1
26	VFG046046	Protein transport protein hofC [Hemorrhagic E.coli pilus (HCP) (CVF825)] [Escherichia coli O83:H1 str. LF82]	hofC	Adherence	99.501	99.501	99.584	99.584	99.584	99.584	99.584	99.584	99.584	99.584	99.584	99.584	99.667	99.667	99.501	96.592	96.592	96.592	96.592	96.592	96.342	96.592	96.509	96.924	96.924	97.839		13	7	1	3		9	1	2	1	5	1	1	1	2	1
26	VFG046058	outer membrane usher protein FimD [Type I fimbriae (CVF426)] [Escherichia coli VR50]	fimD	Adherence	98.218	99.014	98.976	98.976	98.976	98.976	99.014	99.014	99.014	99.014	99.014	98.483	99.962	99.962	99.962	98.976	98.976	98.976	98.976	98.976	98.938	98.938	99.962	99.962	99.962	99.962		13	7	1	3		9	1	2	1	5	1	1	1	2	1
26	VFG046068	curli production assembly/transport component CsgG [Curli fibers (CVF822)] [Escherichia coli VR50]	csgG	Adherence	97.722	97.122	97.122	97.122	97.122	97.122	97.122	97.122	97.122	97.122	97.122	97.122	98.561	98.561	98.561	97.722	97.722	97.722	97.722	97.722	97.722	97.602	100	98.321	98.321	97.482		13	7	1	3		9	1	2	1	5	1	1	1	2	1
26	VFG046069	curli production assembly/transport component CsgF [Curli fibers (CVF822)] [Escherichia coli VR50]	csgF	Adherence	98.561	98.082	98.082	98.082	98.082	98.082	98.082	98.082	98.082	98.082	98.082	98.082	98.321	98.321	98.321	99.52	99.52	99.52	99.52	99.52	99.52	99.52	100	98.321	98.321	98.561		13	7	1	3		9	1	2	1	5	1	1	1	2	1
26	VFG046070	curli production assembly/transport component CsgE [Curli fibers (CVF822)] [Escherichia coli VR50]	csgE	Adherence	98.718	98.718	98.718	98.718	98.718	98.718	98.718	98.718	98.718	98.718	98.718	98.718	98.718	98.718	98.718	99.744	99.744	99.744	99.744	99.744	99.744	99.744	100	99.231	99.231	99.231		13	7	1	3		9	1	2	1	5	1	1	1	2	1
26	VFG046071	csgBAC operon transcriptional regulatory protein [Curli fibers (CVF822)] [Escherichia coli VR50]	csgD	Transcriptional Regulation	99.386	99.078	99.078	99.078	99.078	99.078	99.078	99.078	99.078	99.078	99.078	99.078	99.232	99.232	99.232	98.618	98.618	98.618	98.618	98.618	98.618	98.618	100	99.232	99.232	99.232		13	7	1	3		9	1	2	1	5	1	1	1	2	1
26	VFG046072	minor curlin subunit [Curli fibers (CVF822)] [Escherichia coli VR50]	csgB	Adherence	99.123	99.561	99.561	99.561	99.561	99.561	99.561	99.561	99.561	99.561	99.561	99.561	99.342	99.342	99.342	99.561	99.561	99.561	99.561	99.561	99.561	99.342	100	99.342	99.342	99.561		13	7	1	3		9	1	2	1	5	1	1	1	2	1
26	VFG046073	major curlin subunit [Curli fibers (CVF822)] [Escherichia coli VR50]	csgA	Adherence	90.632	91.285	91.285	91.285	91.285	91.285	91.285	91.285	91.285	91.285	91.285	91.285	90.85	90.85	90.85	99.123	99.123	99.123	99.123	99.123	98.246	98.904	99.342	92.982	92.982	92.105		13	7	1	3		9	1	2	1	5	1	1	1	2	1
26	VFG046074	curli assembly protein CsgC [Curli fibers (CVF822)] [Escherichia coli VR50]	csgC	Adherence	98.198	98.498	98.498	98.498	98.498	98.498	98.498	98.498	98.498	98.498	98.498	98.498	98.198	98.198	98.198	99.399	99.399	99.399	99.399	99.399	98.198	98.498	99.7	98.198	98.198	98.498		13	7	1	3		9	1	2	1	5	1	1	1	2	1
25	VFG020171(gi:187731959)	enterobactin synthase subunit E [Enterobactin synthesis (CVF477)] [Shigella boydii CDC 3083-94]	entE	Iron Uptake	95.655	96.089	96.089	96.089	96.089	96.089	96.089	96.089	96.089	96.089	96.089	96.089	96.027	96.027	96.027	98.386	98.386	98.386	98.386	98.386	98.51	98.572	97.641	-	95.469	95.034		13	7	1	2		9	1	2	1	5	1	1	1	1	1
25	VFG033221(gi:443615869)	type 1 fimbriae major subunit FimA [Type I fimbriae (CVF426)] [Escherichia coli O78:H18 str. WS3294A]	fimA	Adherence	92.168	94	94	94	94	94	94	94	94	94	94	94	98.361	98.361	98.543	92.35	92.35	92.35	92.35	92.35	93.818	92.35	-	98.725	98.725	98.725		13	7	0	3		9	1	2	1	5	1	1	0	2	1
25	VFG034424(gi:386622655)	cryptic Mat fimbrillin [E. coli common pilus (ECP) (CVF625)] [Escherichia coli O7:K1 str. CE10]	ecpA	Adherence	98.667	98.889	98.889	98.889	98.889	98.889	98.889	98.889	98.889	98.889	98.889	98.889	99.111	99.111	-	99.111	99.111	99.111	99.111	99.111	99.111	98.889	98.889	99.556	99.556	99.778		12	7	1	3		9	1	2	0	5	1	1	1	2	1
25	VFG034511(gi:222155096)	hypothetical protein [E. coli common pilus (ECP) (CVF625)] [Escherichia coli O83:H1 str. LF82]	ecpD	Adherence	99.696	99.574	99.574	99.574	99.574	99.574	99.574	99.574	99.574	99.574	99.574	99.453	99.757	99.757	-	98.601	98.601	98.601	98.601	98.601	98.54	98.662	98.966	99.453	99.453	99.453		12	7	1	3		9	1	2	0	5	1	1	1	2	1
25	VFG034684(gi:222155327)	Cation efflux system protein cusC [Invasion of brain endothelial cells (Ibes) (CVF429)] [Escherichia coli O83:H1 str. LF82]	ibeB	Invasion	99.928	99.06	99.06	99.06	99.06	99.06	99.06	99.06	99.06	99.06	99.06	99.277	98.915	98.915	98.915	96.676	96.676	96.676	96.676	96.676	96.749	96.821	-	97.831	97.831	97.542		13	7	0	3		9	1	2	1	5	1	1	0	2	1
25	VFG040947(gi:157156601)	GspL-like protein [gsp (SS206)] [Escherichia coli E24377A]	gspL	Secretion Systems	94.826	92.718	94.826	94.826	94.826	94.826	94.656	94.826	94.826	94.826	94.826	94.148	94.407	94.407	94.656	98.473	98.473	98.473	98.473	98.473	98.388	-	94.572	94.911	94.741	94.232		13	6	1	3		9	1	2	1	5	1	0	1	2	1
25	VFG042718(gi:15801636)	putative adhesin; FimH protein [F9 fimbriae (AI090)] [Escherichia coli O157:H7 str. EDL933]	Z2206	Adherence	96.831	96.503	96.503	96.503	96.503	96.503	96.503	96.503	96.503	96.503	96.503	96.612	96.831	96.831	96.831	98.579	98.579	98.579	98.579	98.579	97.598	98.579	-	97.705	97.705	98.251		13	7	0	3		9	1	2	1	5	1	1	0	2	1
25	VFG043544(gi:15800816)	outer membrane protein A [OmpA (AI330)] [Escherichia coli O157:H7 str. EDL933]	Z1307	Intra Host Survival	95.062	94.967	94.967	94.967	94.967	94.967	94.967	94.967	94.967	94.967	94.967	94.967	97.598	97.598	97.598	95.726	95.726	95.726	95.726	95.726	94.967	99.904	99.808	-	98.559	97.983		13	7	1	2		9	1	2	1	5	1	1	1	1	1
25	VFG045782	Mat/Ecp fimbriae transcriptional regulator [E. coli common pilus (ECP) (CVF625)] [Escherichia coli O25b:H4-ST131]	matA/ecpR	Transcriptional Regulation	99.831	100	100	100	100	100	100	100	100	100	100	100	99.831	99.831	-	97.8	97.8	97.8	97.8	97.8	97.8	97.8	97.124	99.492	99.492	99.831		12	7	1	3		9	1	2	0	5	1	1	1	2	1
25	VFG045784	Mat/Ecp fimbriae periplasmic chaperone protein [E. coli common pilus (ECP) (CVF625)] [Escherichia coli O25b:H4-ST131]	matC/ecpB	Adherence	99.303	100	100	100	100	100	100	100	100	100	100	100	99.442	99.442	-	97.493	97.493	97.493	97.493	97.493	98.047	98.05	97.632	99.025	99.025	98.468		12	7	1	3		9	1	2	0	5	1	1	1	2	1
25	VFG045787	Mat/Ecp fimbriae periplasmic chaperone protein [E. coli common pilus (ECP) (CVF625)] [Escherichia coli O25b:H4-ST131]	matF/ecpE	Adherence	99.603	100	100	100	100	100	100	100	100	100	100	100	99.471	99.471	-	97.619	97.619	97.619	97.619	97.619	97.751	97.619	97.619	97.487	97.487	97.619		12	7	1	3		9	1	2	0	5	1	1	1	2	1
25	VFG046065	putative outer membrane usher protein EcpC [E. coli common pilus (ECP) (CVF625)] [Escherichia coli VR50]	ecpC	Adherence	97.546	97.546	97.546	97.546	97.546	97.546	97.546	97.546	97.546	97.546	97.546	97.506	97.585	97.585	-	99.525	99.525	99.525	99.525	99.525	99.367	98.812	99.96	97.902	97.902	98.06		12	7	1	3		9	1	2	0	5	1	1	1	2	1
24	VFG042714(gi:15801632)	putative fimbrial chaperone protein [F9 fimbriae (AI090)] [Escherichia coli O157:H7 str. EDL933]	Z2201	Adherence	97.361	96.944	96.944	96.944	96.944	96.944	-	96.944	96.944	96.944	96.944	97.083	97.087	97.087	97.222	98.194	98.194	98.194	98.194	98.194	98.194	98.194	-	98.333	98.333	97.778		12	7	0	3		8	1	2	1	5	1	1	0	2	1
24	VFG042715(gi:15801633)	putative fimbrial usher protein [F9 fimbriae (AI090)] [Escherichia coli O157:H7 str. EDL933]	Z2203	Adherence	97.323	97.662	97.662	97.662	97.662	97.662	-	97.662	97.662	97.662	97.662	97.549	97.587	97.587	97.549	98.68	98.68	98.68	98.68	98.68	98.68	98.756	-	98.68	98.68	98.152		12	7	0	3		8	1	2	1	5	1	1	0	2	1
24	VFG043104(gi:15802360)	flagellar protein FliS [peritrichous flagella (AI140)] [Escherichia coli O157:H7 str. EDL933]	fliS	Motility and Chemotaxis	96.594	98.054	98.054	98.054	98.054	98.054	98.054	98.054	98.054	98.054	98.054	97.567	96.837	96.837	96.837	98.297	98.297	98.297	98.297	98.297	-	98.54	97.567	-	98.054	98.054		13	6	1	2		9	1	2	1	5	0	1	1	1	1
23	VFG042713(gi:15801631)	putative major fimbrial subunit [F9 fimbriae (AI090)] [Escherichia coli O157:H7 str. EDL933]	Z2200	Adherence	96.454	96.631	96.631	96.631	96.631	96.631	-	96.631	96.631	96.631	96.631	96.454	96.809	96.809	96.809	99.113	99.113	99.113	99.113	99.113	99.113	99.113	-	97.695	97.695	-		12	7	0	2		8	1	2	1	5	1	1	0	2	0
21	VFG040997	- [AAI/SCI-II (SS182)] [Escherichia coli O44:H18 042]	aaiQ	Unknown	94.444	94.136	93.519	94.136	93.827	94.136	94.136	94.136	94.136	94.136	94.136	94.136	94.444	94.444	94.136	94.444	94.444	94.444	94.444	94.444	-	-	-	94.444	-	-		13	5	0	1		9	1	2	1	5	0	0	0	1	0
20	VFG034245(gi:387616517)	iron transport protein, inner membrane component [Iron/managanease transport (CVF459)] [Escherichia coli O83:H1 str. NRG 857C]	sitD	Iron Uptake	96.853	97.086	98.252	98.252	98.252	98.252	97.086	97.086	97.086	98.368	97.086	96.97	96.737	96.737	96.737	-	-	-	-	-	95.571	-	95.571	96.97	98.252	96.27		13	1	1	3		9	1	2	1	0	1	0	1	2	1
20	VFG040998	- [AAI/SCI-II (SS182)] [Escherichia coli O44:H18 042]	aaiR	Unknown	94.595	94.595	94.595	94.595	94.595	94.595	94.595	94.595	94.595	94.595	94.595	-	94.595	94.595	94.707	92.342	92.342	92.342	92.342	92.342	-	-	-	94.595	-	-		12	5	0	1		9	0	2	1	5	0	0	0	1	0
20	VFG045846	manganese/iron transport system ATP-binding protein [Iron/managanease transport (CVF459)] [Escherichia coli O25b:H4-ST131]	sitB	Iron Uptake	100	100	100	100	100	100	100	100	100	100	100	99.636	99.515	99.515	99.515	-	-	-	-	-	97.576	-	97.697	100	100	97.576		13	1	1	3		9	1	2	1	0	1	0	1	2	1
19	VFG001444(gb|AAG10151)	putative arylsulfatase [AslA (VF0238)] [Escherichia coli O18:K1:H7 str. RS218]	aslA	Invasion	98.67	98.181	98.181	98.181	98.181	98.181	98.181	98.181	98.181	98.181	98.181	98.181	98.46	98.46	98.46	-	-	-	-	-	-	-	93.562	97.131	97.201	97.411		13	0	1	3		9	1	2	1	0	0	0	1	2	1
19	VFG034117(gi:386619568)	hypothetical protein [Yersiniabactin siderophore (CVF458)] [Escherichia coli NA114]	irp1	Iron Uptake	99.455	99.682	99.682	99.682	99.682	99.682	99.682	99.682	99.682	99.682	99.682	99.568	99.477	99.477	98.932	-	-	-	-	-	-	-	99.432	99.364	99.341	99.364		13	0	1	3		9	1	2	1	0	0	0	1	2	1
19	VFG034204(gi:386604842)	iron transport protein, periplasmic-binding protein [Iron/managanease transport (CVF459)] [Escherichia coli UM146]	sitA	Iron Uptake	99.235	99.781	99.781	99.781	-	99.781	99.781	99.781	99.781	99.781	99.781	99.454	99.344	99.344	99.344	-	-	-	-	-	97.049	-	97.049	99.781	99.781	97.158		12	1	1	3		8	1	2	1	0	1	0	1	2	1
19	VFG034232(gi:387616518)	SitC [Iron/managanease transport (CVF459)] [Escherichia coli O83:H1 str. NRG 857C]	sitC	Iron Uptake	98.834	99.068	99.883	99.883	99.883	99.883	99.068	99.068	99.068	99.767	99.068	99.068	99.068	99.068	99.068	-	-	-	-	-	99.417	-	99.417	99.068	-	99.417		13	1	1	2		9	1	2	1	0	1	0	1	1	1
19	VFG044323(gi:238895508)	salicylate synthase Irp9 [yersiniabactin (IA007)] [Klebsiella pneumoniae subsp. pneumoniae NTUH-K2044]	ybtS	Iron Uptake	99.617	99.617	99.617	99.617	99.617	99.617	99.617	99.617	99.617	99.617	99.617	99.617	99.54	99.54	99.54	-	-	-	-	-	-	-	99.54	99.54	97.318	99.464		13	0	1	3		9	1	2	1	0	0	0	1	2	1
19	VFG044327(gi:238895512)	transcriptional regulator [yersiniabactin (IA007)] [Klebsiella pneumoniae subsp. pneumoniae NTUH-K2044]	ybtA	Transcriptional Regulation	99.167	98.958	98.958	98.958	98.958	98.958	98.958	98.958	98.958	98.958	98.958	99.167	99.167	99.167	99.167	-	-	-	-	-	-	-	99.271	99.167	99.583	99.167		13	0	1	3		9	1	2	1	0	0	0	1	2	1
19	VFG045842	YbtT protein [Yersiniabactin siderophore (CVF458)] [Escherichia coli O25b:H4-ST131]	ybtT	Iron Uptake	99.873	100	100	100	100	100	100	100	100	100	100	99.62	99.62	99.62	99.62	-	-	-	-	-	-	-	99.62	99.747	99.62	99.747		13	0	1	3		9	1	2	1	0	0	0	1	2	1
19	VFG046108	putative cytoplasmic transmembrane protein [Yersiniabactin siderophore (CVF458)] [Escherichia coli VR50]	ECVR50_2112	Iron Uptake	99.573	99.644	99.644	99.644	99.644	99.644	99.644	99.644	99.644	99.644	99.644	99.288	99.573	99.573	99.573	-	-	-	-	-	-	-	99.929	99.786	97.721	99.786		13	0	1	3		9	1	2	1	0	0	0	1	2	1
19	VFG046109	putative ABC transporter protein [Yersiniabactin siderophore (CVF458)] [Escherichia coli VR50]	ECVR50_2113	Iron Uptake	99.563	99.399	99.399	99.399	99.399	99.399	99.399	99.399	99.399	99.399	99.399	99.399	99.563	99.563	99.563	-	-	-	-	-	-	-	99.891	99.672	99.563	99.727		13	0	1	3		9	1	2	1	0	0	0	1	2	1
19	VFG046110	putative inner membrane ABC-transporter [Yersiniabactin siderophore (CVF458)] [Escherichia coli VR50]	ECVR50_2114	Iron Uptake	99.889	99.723	99.723	99.723	99.723	99.723	99.723	99.723	99.723	99.723	99.723	99.667	99.723	99.723	99.723	-	-	-	-	-	-	-	99.945	99.889	99.612	99.889		13	0	1	3		9	1	2	1	0	0	0	1	2	1
19	VFG046114	yersiniabactin biosynthetic protein YbtU [Yersiniabactin siderophore (CVF458)] [Escherichia coli VR50]	ECVR50_2118	Iron Uptake	99.728	99.546	99.546	99.546	99.546	99.546	99.546	99.546	99.546	99.546	99.546	99.455	99.546	99.546	99.455	-	-	-	-	-	-	-	99.637	99.728	99.546	99.728		13	0	1	3		9	1	2	1	0	0	0	1	2	1
19	VFG046116	yersiniabactin siderophore biosynthetic protein YbtE [Yersiniabactin siderophore (CVF458)] [Escherichia coli VR50]	ECVR50_2120	Iron Uptake	99.683	99.683	99.683	99.683	99.683	99.683	99.683	99.683	99.683	99.683	99.683	99.62	99.683	99.683	99.683	-	-	-	-	-	-	-	99.747	99.747	99.62	99.747		13	0	1	3		9	1	2	1	0	0	0	1	2	1
19	VFG046117	pesticin receptor precursor [Yersiniabactin siderophore (CVF458)] [Escherichia coli VR50]	ECVR50_2121	Iron Uptake	99.753	99.604	99.604	99.604	99.604	99.604	99.604	99.604	99.604	99.604	99.604	99.703	99.753	99.753	99.753	-	-	-	-	-	-	-	99.703	99.703	99.753	99.753		13	0	1	3		9	1	2	1	0	0	0	1	2	1
18	VFG001448(gb|AAA21682)	KpsD [K1 capsule (VF0239)] [Escherichia coli O18:K1:H7 str. RS218]	kpsD	Intra Host Survival	98.807	99.523	98.867	98.867	98.867	98.867	98.33	98.867	98.867	98.867	98.867	97.555	99.046	99.046	98.33	-	-	-	-	-	-	-	98.33	98.211	-	97.913		13	0	1	2		9	1	2	1	0	0	0	1	1	1
17	VFG001450(gb|AAA24046)	KpsM [K1 capsule (VF0239)] [Escherichia coli O18:K1:H7 str. RS218]	kpsM	Intra Host Survival	91.26	91.26	91.26	91.26	91.26	91.26	94.723	91.26	91.26	91.26	91.26	-	99.871	99.871	94.852	-	-	-	-	-	-	-	95.109	94.208	-	95.109		12	0	1	2		9	0	2	1	0	0	0	1	1	1
17	VFG033377(gi:386598798)	hypothetical protein [S fimbriae (VF0235)] [Escherichia coli O18:K1:H7 str. IHE3034]	sfaC	Adherence	98.649	95.045	95.045	95.045	95.045	95.045	95.045	95.045	95.045	95.045	95.045	95.045	95.045	95.045	95.045	-	-	-	-	-	-	-	95.495	92.342	-	-		13	0	1	1		9	1	2	1	0	0	0	1	1	0
17	VFG033993(gi:387615312)	aerobactin siderophore biosynthesis protein IucB [Aerobactin siderophore (CVF457)] [Escherichia coli O83:H1 str. NRG 857C]	iucB	Iron Uptake	95.57	95.253	99.789	99.789	99.789	99.789	95.253	95.253	95.253	95.253	95.253	95.253	95.253	95.253	95.253	-	-	-	-	-	-	-	-	95.675	99.895	-		13	0	0	2		9	1	2	1	0	0	0	0	2	0
17	VFG034005(gi:218534490)	Aerobactin siderophore biosynthesis protein IucA [Aerobactin siderophore (CVF457)] [Escherichia coli O45:K1:H7 str. S88]	iucA	Iron Uptake	94.239	94.016	100	100	100	100	94.016	94.016	94.016	94.016	94.016	94.016	94.016	94.016	94.016	-	-	-	-	-	-	-	-	94.239	99.944	-		13	0	0	2		9	1	2	1	0	0	0	0	2	0
17	VFG034262(gi:222158205)	heme/hemoglobin transport protein [Hemin uptake (CVF460)] [Escherichia coli O83:H1 str. LF82]	chuS	Iron Uptake	99.708	98.737	98.737	98.737	98.737	98.737	98.737	98.737	98.737	98.737	98.737	98.737	99.223	99.223	-	-	-	-	-	-	-	-	-	96.408	96.408	97.961		12	0	0	3		9	1	2	0	0	0	0	0	2	1
17	VFG034280(gi:222158206)	Outer membrane hemin receptor chuA [Hemin uptake (CVF460)] [Escherichia coli O83:H1 str. LF82]	chuA	Iron Uptake	99.798	99.597	99.597	99.597	99.597	99.597	99.597	99.597	99.597	99.597	99.597	99.597	99.798	99.798	-	-	-	-	-	-	-	-	-	98.235	98.235	98.588		12	0	0	3		9	1	2	0	0	0	0	0	2	1
17	VFG034334(gi:222158209)	hypothetical protein [Hemin uptake (CVF460)] [Escherichia coli O83:H1 str. LF82]	chuX	Iron Uptake	99.798	99.798	99.798	99.798	99.798	99.798	99.798	99.798	99.798	99.798	99.798	99.798	99.798	99.798	-	-	-	-	-	-	-	-	-	94.747	94.747	95.556		12	0	0	3		9	1	2	0	0	0	0	0	2	1
17	VFG034352(gi:222158210)	hypothetical protein [Hemin uptake (CVF460)] [Escherichia coli O83:H1 str. LF82]	chuY	Iron Uptake	98.558	99.359	99.359	99.359	99.359	99.359	99.359	99.359	99.359	99.359	99.359	99.519	99.519	99.519	-	-	-	-	-	-	-	-	-	97.917	97.917	97.276		12	0	0	3		9	1	2	0	0	0	0	0	2	1
17	VFG044172(gb|NP_756180)	ATP-binding hydrophilic protein ChuV [Chu (VF0227)] [Escherichia coli CFT073]	chuV	Iron Uptake	100	99.75	99.75	99.75	99.75	99.75	99.75	99.75	99.75	99.75	99.75	99.75	99.75	99.75	-	-	-	-	-	-	-	-	-	98.876	98.876	98.377		12	0	0	3		9	1	2	0	0	0	0	0	2	1
17	VFG045771	regulator protein PapX [P fimbriae (CVF425)] [Escherichia coli O25b:H4-ST131]	papX	Transcriptional Regulation	97.552	100	100	100	100	100	100	100	100	100	100	100	99.812	99.812	100	-	-	-	-	-	-	-	99.623	97.552	-	-		13	0	1	1		9	1	2	1	0	0	0	1	1	0
17	VFG045851	putative periplasmic binding protein [Hemin uptake (CVF460)] [Escherichia coli O25b:H4-ST131]	chuT	Iron Uptake	99.799	100	100	100	100	100	100	100	100	100	100	100	99.899	99.899	-	-	-	-	-	-	-	-	-	97.08	97.08	99.396		12	0	0	3		9	1	2	0	0	0	0	0	2	1
17	VFG045852	putative oxygen independent coproporphyrinogen III oxidase [Hemin uptake (CVF460)] [Escherichia coli O25b:H4-ST131]	chuW	Iron Uptake	98.879	100	100	100	100	100	100	100	100	100	100	99.626	99.327	99.327	-	-	-	-	-	-	-	-	-	96.338	96.338	97.235		12	0	0	3		9	1	2	0	0	0	0	0	2	1
17	VFG045855	putative permease of iron compound ABC transport system [Hemin uptake (CVF460)] [Escherichia coli O25b:H4-ST131]	chuU	Iron Uptake	99.478	100	100	100	100	100	100	100	100	100	100	99.373	99.582	99.582	-	-	-	-	-	-	-	-	-	98.328	98.328	99.164		12	0	0	3		9	1	2	0	0	0	0	0	2	1
16	VFG001731(gi:26249445)	bifunctional enterobactin receptor/adhesin protein [IrgA homolog adhesin (Iha) (AI324)] [Escherichia coli CFT073]	c3610	Iron Uptake	100	99.809	99.809	99.809	99.809	99.809	99.809	99.809	99.809	99.809	99.809	99.809	99.761	99.761	99.809	-	-	-	-	-	-	-	-	100	-	-		13	0	0	1		9	1	2	1	0	0	0	0	1	0
16	VFG002053(gb|YP_404606)	general secretion pathway protein J [T2SS (VF0333)] [Shigella dysenteriae Sd197]	gspJ	Secretion Systems	-	94.386	-	-	-	-	94.386	-	-	-	-	94.211	94.386	94.386	94.386	97.193	97.193	97.193	97.193	97.193	97.193	-	94.386	95.263	93.86	94.561		5	6	1	3		1	1	2	1	5	1	0	1	2	1
16	VFG040948(gi:157155920)	general secretion pathway protein K [gsp (SS206)] [Escherichia coli E24377A]	gspK	Secretion Systems	-	95.092	-	-	-	-	95.399	-	-	-	-	95.808	95.399	95.399	95.399	97.342	97.342	97.342	97.342	97.342	97.751	-	95.297	96.421	95.194	95.808		5	6	1	3		1	1	2	1	5	1	0	1	2	1
16	VFG040950(gi:157156956)	general secretion pathway protein I [gsp (SS206)] [Escherichia coli E24377A]	gspI	Secretion Systems	-	94.355	-	-	-	-	94.624	-	-	-	-	94.892	94.624	94.624	94.624	99.731	99.731	99.731	99.731	99.731	100	-	94.086	95.43	91.129	94.624		5	6	1	3		1	1	2	1	5	1	0	1	2	1
16	VFG040951(gi:157158634)	general secretion pathway protein H [gsp (SS206)] [Escherichia coli E24377A]	gspH	Secretion Systems	-	96.277	-	-	-	-	94.504	-	-	-	-	96.809	94.504	94.504	94.504	99.823	99.823	99.823	99.823	99.823	96.454	-	94.504	95.922	95.39	94.504		5	6	1	3		1	1	2	1	5	1	0	1	2	1
16	VFG040952(gi:157157959)	general secretion pathway protein G [gsp (SS206)] [Escherichia coli E24377A]	gspG	Secretion Systems	-	96.272	-	-	-	-	96.272	-	-	-	-	96.491	96.272	96.272	96.272	97.807	97.807	97.807	97.807	97.807	99.781	-	96.272	96.053	96.491	96.491		5	6	1	3		1	1	2	1	5	1	0	1	2	1
16	VFG040953(gi:157154920)	general secretion pathway protein F [gsp (SS206)] [Escherichia coli E24377A]	gspF	Secretion Systems	-	94.281	-	-	-	-	94.281	-	-	-	-	94.363	94.199	94.199	94.281	97.876	97.876	97.876	97.876	97.876	98.775	-	94.281	95.997	94.608	94.526		5	6	1	3		1	1	2	1	5	1	0	1	2	1
16	VFG040954(gi:157159001)	general secretory pathway protein E [gsp (SS206)] [Escherichia coli E24377A]	gspE	Secretion Systems	-	94.783	-	-	-	-	94.916	-	-	-	-	94.849	94.849	94.849	94.916	99.598	99.598	99.598	99.598	99.598	99.531	-	94.916	95.716	94.98	94.783		5	6	1	3		1	1	2	1	5	1	0	1	2	1
16	VFG040955(gi:157157281)	general secretion pathway protein D [gsp (SS206)] [Escherichia coli E24377A]	gspD	Secretion Systems	-	97.089	-	-	-	-	97.186	-	-	-	-	96.604	97.186	97.186	97.186	99.951	99.951	99.951	99.951	99.951	98.738	-	97.186	96.749	96.217	97.089		5	6	1	3		1	1	2	1	5	1	0	1	2	1
16	VFG040956(gi:157156659)	putative type II secretion protein GspC [gsp (SS206)] [Escherichia coli E24377A]	gspC	Secretion Systems	-	95.833	-	-	-	-	94.479	-	-	-	-	97.292	94.479	94.479	94.479	99.896	99.896	99.896	99.896	99.896	99.062	-	94.271	97.5	97.604	96.146		5	6	1	3		1	1	2	1	5	1	0	1	2	1
16	VFG045799	hypothetical protein [SCI-I T6SS (CVF734)] [Escherichia coli O25b:H4-ST131]	EC958_5031	Secretion Systems	99.042	100	100	100	100	100	100	100	100	100	100	100	98.659	98.659	98.659	-	-	-	-	-	-	96.743	-	-	-	-		13	1	0	0		9	1	2	1	0	0	1	0	0	0
16	VFG046097	secreted autotranspoter toxin [Sat (CVF448)] [Escherichia coli VR50]	ECVR50_3325	Toxin	99.537	99.871	99.871	99.871	99.871	99.871	99.871	99.871	99.871	99.871	99.871	99.82	99.794	99.794	99.871	-	-	-	-	-	-	-	-	99.511	-	-		13	0	0	1		9	1	2	1	0	0	0	0	1	0
15	VFG020173(gi:187732379)	enterobactin synthase subunit F [Enterobactin synthesis (CVF477)] [Shigella boydii CDC 3083-94]	entF	Iron Uptake	-	-	-	-	-	-	-	-	-	-	-	96.162	96.213	96.213	96.239	96.96	96.96	96.96	96.96	96.96	96.78	96.394	97.321	95.981	95.981	96.213		4	7	1	3		0	1	2	1	5	1	1	1	2	1
15	VFG033958(gi:218701709)	L-lysine 6-monooxygenase [Aerobactin siderophore (CVF457)] [Escherichia coli O7:K1 str. IAI39]	iucD	Iron Uptake	-	100	100	100	100	100	100	100	100	100	100	100	100	100	100	-	-	-	-	-	-	-	-	-	100	-		13	0	0	1		9	1	2	1	0	0	0	0	1	0
15	VFG035135(gi:222157502)	hypothetical protein [SCI-I T6SS (CVF734)] [Escherichia coli O83:H1 str. LF82]	LF82_428	Secretion Systems	98.43	97.982	97.982	97.982	97.982	97.982	97.982	97.982	97.982	97.982	97.982	97.982	96.936	96.936	96.936	-	-	-	-	-	-	-	-	-	-	-		13	0	0	0		9	1	2	1	0	0	0	0	0	0
15	VFG035152(gi:387618084)	hypothetical protein [SCI-I T6SS (CVF734)] [Escherichia coli O83:H1 str. NRG 857C]	NRG857_13800	Secretion Systems	95.946	96.697	96.697	96.697	96.697	96.697	96.697	96.697	96.697	96.697	96.697	96.697	93.994	93.994	93.994	-	-	-	-	-	-	-	-	-	-	-		13	0	0	0		9	1	2	1	0	0	0	0	0	0
15	VFG035178(gi:386620388)	hypothetical protein [SCI-I T6SS (CVF734)] [Escherichia coli NA114]	ECNA114_2858	Secretion Systems	98.984	100	100	100	100	100	100	100	100	100	100	100	99.593	99.593	99.593	-	-	-	-	-	-	-	-	-	-	-		13	0	0	0		9	1	2	1	0	0	0	0	0	0
15	VFG035199(gi:222157506)	ClpB protein [SCI-I T6SS (CVF734)] [Escherichia coli O83:H1 str. LF82]	LF82_432	Secretion Systems	98.938	95.867	95.829	95.829	95.829	95.829	95.867	95.829	95.829	95.829	95.829	95.867	95.791	95.791	95.791	-	-	-	-	-	-	-	-	-	-	-		13	0	0	0		9	1	2	1	0	0	0	0	0	0
15	VFG035277(gi:386620400)	hypothetical protein [SCI-I T6SS (CVF734)] [Escherichia coli NA114]	ECNA114_2870	Secretion Systems	95.4	100	100	100	100	100	100	100	100	100	100	99.943	96.025	96.025	96.025	-	-	-	-	-	-	-	-	-	-	-		13	0	0	0		9	1	2	1	0	0	0	0	0	0
15	VFG035305(gi:386620402)	hypothetical protein [SCI-I T6SS (CVF734)] [Escherichia coli NA114]	ECNA114_2871	Secretion Systems	98.51	100	100	100	100	100	100	100	100	100	100	100	98.696	98.696	98.696	-	-	-	-	-	-	-	-	-	-	-		13	0	0	0		9	1	2	1	0	0	0	0	0	0
15	VFG035321(gi:386620403)	hypothetical protein [SCI-I T6SS (CVF734)] [Escherichia coli NA114]	ECNA114_2872	Secretion Systems	99.068	100	100	100	100	100	100	100	100	100	100	99.767	99.068	99.068	99.068	-	-	-	-	-	-	-	-	-	-	-		13	0	0	0		9	1	2	1	0	0	0	0	0	0
15	VFG036082(gi:222154937)	Uropathogenic specific protein (EC 31211) [Colicin-like Usp (CVF754)] [Escherichia coli O83:H1 str. LF82]	usp	Toxin	97.924	95.521	95.521	95.521	95.521	95.521	95.521	95.521	95.521	95.521	95.521	95.521	99.551	99.551	99.551	-	-	-	-	-	-	-	-	-	-	-		13	0	0	0		9	1	2	1	0	0	0	0	0	0
15	VFG045349(gb|YP_002390132)	adhesin FdeC [FdeC (VF0506)] [Escherichia coli O45:K1:H7 str. S88]	fdeC	Adherence	99.765	97.461	97.461	97.461	97.461	97.461	97.461	97.461	97.461	97.461	97.461	97.484	99.624	99.624	99.647	-	-	-	-	-	-	-	-	-	-	-		13	0	0	0		9	1	2	1	0	0	0	0	0	0
15	VFG045800	hypothetical protein [SCI-I T6SS (CVF734)] [Escherichia coli O25b:H4-ST131]	EC958_5032	Secretion Systems	94.304	100	100	100	100	100	100	99.935	99.935	99.935	99.935	100	96.764	96.764	96.764	-	-	-	-	-	-	-	-	-	-	-		13	0	0	0		9	1	2	1	0	0	0	0	0	0
15	VFG045812	hypothetical protein [SCI-I T6SS (CVF734)] [Escherichia coli O25b:H4-ST131]	EC958_3105	Secretion Systems	94.628	100	100	100	100	100	100	100	100	100	100	100	96.276	96.276	96.276	-	-	-	-	-	-	-	-	-	-	-		13	0	0	0		9	1	2	1	0	0	0	0	0	0
15	VFG045814	hypothetical protein [SCI-I T6SS (CVF734)] [Escherichia coli O25b:H4-ST131]	EC958_5040	Secretion Systems	97.429	100	100	100	100	100	100	100	100	100	100	99.908	97.704	97.704	97.704	-	-	-	-	-	-	-	-	-	-	-		13	0	0	0		9	1	2	1	0	0	0	0	0	0
15	VFG045817	hypothetical protein [SCI-I T6SS (CVF734)] [Escherichia coli O25b:H4-ST131]	EC958_5043	Secretion Systems	98.039	100	100	100	100	100	100	100	100	100	100	99.201	98.039	98.039	98.039	-	-	-	-	-	-	-	-	-	-	-		13	0	0	0		9	1	2	1	0	0	0	0	0	0
15	VFG045825	autotransporter protein UpaC [EhaB, AIDA-I type (CVF744)] [Escherichia coli O25b:H4-ST131]	upaC	Adherence	98.795	100	100	100	100	100	100	100	100	100	100	100	98.862	98.862	98.862	-	-	-	-	-	-	-	-	-	-	-		13	0	0	0		9	1	2	1	0	0	0	0	0	0
15	VFG046112	yersiniabactin biosynthetic protein [Yersiniabactin siderophore (CVF458)] [Escherichia coli VR50]	ECVR50_2116	Iron Uptake	-	99.394	99.394	99.394	99.394	99.394	99.394	99.394	99.394	99.394	99.394	99.361	-	-	-	-	-	-	-	-	-	-	99.951	99.591	99.46	99.656		10	0	1	3		9	1	0	0	0	0	0	1	2	1
14	VFG046098	putative autotransporter [Antigen 43, AIDA-I type (CVF451)] [Escherichia coli VR50]	flu2	Adherence	92.133	91.371	91.304	91.304	91.304	91.304	91.304	91.304	91.304	91.304	91.304	91.304	-	-	-	-	-	-	-	-	-	-	91.145	-	90.694	-		10	0	1	1		9	1	0	0	0	0	0	1	1	0
13	VFG044171(gi:26248334)	putative outer membrane receptor for iron compound or colicin [direct heme uptake system (IA048)] [Escherichia coli CFT073]	hma	Iron Uptake	100	100	100	100	100	100	100	100	100	100	100	100	-	-	-	-	-	-	-	-	-	-	-	-	-	99.441		10	0	0	1		9	1	0	0	0	0	0	0	0	1
12	VFG013006(gi:110804572)	enterochelin synthetase, component D [Enterobactin synthesis (CVF477)] [Shigella flexneri 5 str. 8401]	entD	Iron Uptake	93.904	-	-	-	-	-	-	-	-	-	-	-	-	-	-	96.757	96.757	96.757	96.757	96.757	97.276	97.276	96.887	93.256	93.256	92.737		0	7	1	3		0	0	0	0	5	1	1	1	2	1
12	VFG033090(gi:386627096)	fimbrial PapG protein [P fimbriae (CVF425)] [Escherichia coli O7:K1 str. CE10]	papG	Adherence	99.505	-	98.714	98.714	98.714	98.714	98.714	98.714	98.714	98.714	98.615	-	-	-	99.308	-	-	-	-	-	-	-	-	98.417	-	-		10	0	0	1		9	0	0	1	0	0	0	0	1	0
12	VFG033098(gi:386627095)	fimbrial adapter PapF [P fimbriae (CVF425)] [Escherichia coli O7:K1 str. CE10]	papF	Adherence	99.401	-	100	100	100	100	100	100	100	100	100	-	-	-	100	-	-	-	-	-	-	-	-	99.8	-	-		10	0	0	1		9	0	0	1	0	0	0	0	1	0
12	VFG033113(gi:386627093)	fimbrial adapter PapK [P fimbriae (CVF425)] [Escherichia coli O7:K1 str. CE10]	papK	Adherence	99.111	-	99.111	99.111	99.111	99.111	99.111	99.111	99.111	99.111	99.111	-	-	-	99.556	-	-	-	-	-	-	-	-	97.778	-	-		10	0	0	1		9	0	0	1	0	0	0	0	1	0
12	VFG033117(gi:218706494)	protein PapJ , P pilus assembly [P fimbriae (CVF425)] [Escherichia coli O17:K52:H18 str. UMN026]	papJ	Adherence	98.797	-	98.797	98.797	98.797	98.797	98.797	98.797	98.797	98.797	98.797	-	-	-	98.454	-	-	-	-	-	-	-	-	100	-	-		10	0	0	1		9	0	0	1	0	0	0	0	1	0
12	VFG033125(gi:386627091)	Chaperone protein PapD [P fimbriae (CVF425)] [Escherichia coli O7:K1 str. CE10]	papD	Adherence	99.861	-	99.861	99.861	99.861	99.861	99.861	99.861	99.861	99.861	99.861	-	-	-	99.444	-	-	-	-	-	-	-	-	99.861	-	-		10	0	0	1		9	0	0	1	0	0	0	0	1	0
12	VFG033132(gi:386627090)	Outer membrane usher protein PapC [P fimbriae (CVF425)] [Escherichia coli O7:K1 str. CE10]	papC	Adherence	99.763	-	99.763	99.763	99.763	99.763	99.803	99.803	99.803	99.803	99.803	-	-	-	99.724	-	-	-	-	-	-	-	-	99.763	-	-		10	0	0	1		9	0	0	1	0	0	0	0	1	0
12	VFG033975(gi:386622242)	Citrate:6-N-acetyl-6-N-hydroxy-L-lysine ligase,alpha subunit, aerobactin biosynthesis protein / Siderophore synthetase superfamily, group C / Siderophore synthetase component, ligase [Aerobactin siderophore (CVF457)] [Escherichia coli NA114]	iucC	Iron Uptake	98.164	100	-	-	-	-	100	100	100	100	100	99.943	99.885	99.885	99.885	-	-	-	-	-	-	-	-	-	97.82	-		9	0	0	1		5	1	2	1	0	0	0	0	1	0
12	VFG046102	IutA [Aerobactin siderophore (CVF457)] [Escherichia coli VR50]	ECVR50_3327	Iron Uptake	-	99.907	-	99.907	-	-	99.907	99.907	99.907	99.907	99.907	99.953	99.953	99.953	99.953	-	-	-	-	-	-	-	-	-	99.953	-		10	0	0	1		6	1	2	1	0	0	0	0	1	0
11	VFG033149(gi:386641967)	pap operon regulatory protein PapB [P fimbriae (CVF425)] [Escherichia coli ABU 83972]	papB	Transcriptional Regulation	99.365	98.413	-	99.683	-	99.683	99.683	99.048	-	-	-	98.413	98.413	98.413	98.413	-	-	-	-	-	-	-	98.73	-	-	-		8	0	1	0		4	1	2	1	0	0	0	1	0	0
11	VFG035162(gi:386620387)	hypothetical protein [SCI-I T6SS (CVF734)] [Escherichia coli NA114]	ECNA114_2857	Secretion Systems	-	100	100	100	100	100	100	100	100	100	100	100	-	-	-	-	-	-	-	-	-	-	-	-	-	-		10	0	0	0		9	1	0	0	0	0	0	0	0	0
11	VFG035960(gi:386621289)	hypothetical protein [UpaG adhesin, trimeric AT (CVF740)] [Escherichia coli NA114]	upaG/ehaG	Adherence	-	100	100	100	100	100	100	100	100	100	99.977	100	-	-	-	-	-	-	-	-	-	-	-	-	-	-		10	0	0	0		9	1	0	0	0	0	0	0	0	0
11	VFG045809	hypothetical protein [SCI-I T6SS (CVF734)] [Escherichia coli O25b:H4-ST131]	EC958_0639	Secretion Systems	-	100	100	100	100	100	100	100	100	100	100	99.95	-	-	-	-	-	-	-	-	-	-	-	-	-	-		10	0	0	0		9	1	0	0	0	0	0	0	0	0
11	VFG045824	serine protease autotransporter protein [EspC, SPATE (CVF742)] [Escherichia coli O25b:H4-ST131]	EC958_4614	Toxin	-	100	100	100	100	100	100	100	100	100	100	99.059	-	-	-	-	-	-	-	-	-	-	-	-	-	-		10	0	0	0		9	1	0	0	0	0	0	0	0	0
11	VFG045826	Fluffing protein [Cah, AIDA-I type (CVF745)] [Escherichia coli O25b:H4-ST131]	EC958_5138	Adherence	-	100	100	100	100	100	100	100	100	100	100	-	-	-	-	-	-	-	-	-	-	-	-	-	-	96.488		9	0	0	1		9	0	0	0	0	0	0	0	0	1
10	VFG033103(gi:218706492)	Fimbrial protein [P fimbriae (CVF425)] [Escherichia coli O17:K52:H18 str. UMN026]	papE	Adherence	-	-	98.718	98.718	98.718	98.718	98.718	98.718	98.718	98.718	98.718	-	-	-	-	-	-	-	-	-	-	-	-	100	-	-		9	0	0	1		9	0	0	0	0	0	0	0	1	0
10	VFG034757(gi:387506964)	non-LEE-encoded type III secreted effector [EspL1 (CVF688)] [Escherichia coli O55:H7 str. RM12579]	espL1	Virulence effector	-	-	-	-	-	-	-	-	-	-	-	-	-	-	-	94.567	94.567	94.567	94.567	94.567	-	94.567	97.654	95.976	95.976	95.506		0	6	1	3		0	0	0	0	5	0	1	1	2	1
10	VFG034869(gi:387509493)	hypothetical protein [EspX4 (CVF703)] [Escherichia coli O55:H7 str. RM12579]	espX4	Virulence effector	-	-	-	-	-	-	-	-	-	-	-	-	-	-	-	92.984	92.984	92.984	92.984	92.984	92.92	92.984	93.3	96.142	96.142	-		0	7	1	2		0	0	0	0	5	1	1	1	2	0
10	VFG034875(gi:291285483)	hypothetical protein [EspX5 (CVF704)] [Escherichia coli O55:H7 str. CB9615]	espX5	Virulence effector	-	-	-	-	-	-	-	-	-	-	-	-	-	-	-	95.746	95.746	95.746	95.746	95.746	95.824	95.824	97.448	96.288	96.288	-		0	7	1	2		0	0	0	0	5	1	1	1	2	0
10	VFG042083(gi:15832980)	surface presentation of antigens protein SpaO [ETT2 (SS017)] [Escherichia coli O157:H7 str. Sakai]	epaO	Secretion Systems	-	-	-	-	-	-	-	-	-	-	-	-	-	-	-	96.66	96.66	96.66	96.66	96.66	96.356	96.154	-	94.939	94.939	96.053		0	7	0	3		0	0	0	0	5	1	1	0	2	1
10	VFG042084(gi:15832979)	surface presentation of antigens protein SpaP [ETT2 (SS017)] [Escherichia coli O157:H7 str. Sakai]	epaP	Secretion Systems	-	-	-	-	-	-	-	-	-	-	-	-	-	-	-	97.297	97.297	97.297	97.297	97.297	97.748	97.748	-	98.048	98.048	97.748		0	7	0	3		0	0	0	0	5	1	1	0	2	1
10	VFG042088(gi:15832974)	transcriptional regulator [ETT2 (SS017)] [Escherichia coli O157:H7 str. Sakai]	etrA	Transcriptional Regulation	-	-	-	-	-	-	-	-	-	-	-	-	-	-	-	96.806	96.806	96.806	96.806	96.806	97.605	97.605	-	96.607	96.607	97.006		0	7	0	3		0	0	0	0	5	1	1	0	2	1
10	VFG042089(gi:15832971)	EprJ [ETT2 (SS017)] [Escherichia coli O157:H7 str. Sakai]	eprJ	Secretion Systems	-	-	-	-	-	-	-	-	-	-	-	-	-	-	-	97.297	97.297	97.297	97.297	97.297	97.898	97.898	-	96.997	96.997	97.598		0	7	0	3		0	0	0	0	5	1	1	0	2	1
10	VFG042090(gi:15832972)	EprI [ETT2 (SS017)] [Escherichia coli O157:H7 str. Sakai]	eprI	Secretion Systems	-	-	-	-	-	-	-	-	-	-	-	-	-	-	-	97.095	97.095	97.095	97.095	97.095	97.095	97.095	-	98.333	98.333	98.75		0	7	0	3		0	0	0	0	5	1	1	0	2	1
10	VFG042091(gi:15832969)	hypothetical protein [ETT2 (SS017)] [Escherichia coli O157:H7 str. Sakai]	orgA	Secretion Systems	-	-	-	-	-	-	-	-	-	-	-	-	-	-	-	96.564	96.564	96.564	96.564	96.564	96.392	96.22	-	93.643	93.643	93.814		0	7	0	3		0	0	0	0	5	1	1	0	2	1
10	VFG042092(gi:15832970)	EprK [ETT2 (SS017)] [Escherichia coli O157:H7 str. Sakai]	eprK	Secretion Systems	-	-	-	-	-	-	-	-	-	-	-	-	-	-	-	97.687	97.687	97.687	97.687	97.687	97.551	97.823	-	95.238	95.238	94.83		0	7	0	3		0	0	0	0	5	1	1	0	2	1
10	VFG042093(gi:15832967)	hypothetical protein [ETT2 (SS017)] [Escherichia coli O157:H7 str. Sakai]	orgB	Secretion Systems	-	-	-	-	-	-	-	-	-	-	-	-	-	-	-	95.139	95.139	95.139	95.139	95.139	95.602	95.602	-	93.287	93.287	93.287		0	7	0	3		0	0	0	0	5	1	1	0	2	1
10	VFG042095(gi:15832966)	hypothetical protein [ETT2 (SS017)] [Escherichia coli O157:H7 str. Sakai]	ECs3712	Secretion Systems	-	-	-	-	-	-	-	-	-	-	-	-	-	-	-	97.156	97.156	97.156	97.156	97.156	96.998	97.63	-	97.156	97.156	98.104		0	7	0	3		0	0	0	0	5	1	1	0	2	1
10	VFG042097(gi:15832963)	transcriptional regulator [ETT2 (SS017)] [Escherichia coli O157:H7 str. Sakai]	ygeH	Transcriptional Regulation	-	-	-	-	-	-	-	-	-	-	-	-	-	-	-	97.821	97.821	97.821	97.821	97.821	97.749	98.693	-	94.775	94.775	94.553		0	7	0	3		0	0	0	0	5	1	1	0	2	1
10	VFG042590(gi:46487739)	StgA [Stg fimbriae (AI047)] [Escherichia coli O78:K80:H9 chi7122]	stgA	Adherence	-	-	-	-	-	-	-	-	-	-	-	-	-	-	-	100	100	100	100	100	99.825	99.825	-	95.637	95.637	95.637		0	7	0	3		0	0	0	0	5	1	1	0	2	1
10	VFG042591(gi:46487740)	StgB [Stg fimbriae (AI047)] [Escherichia coli O78:K80:H9 chi7122]	stgB	Adherence	-	-	-	-	-	-	-	-	-	-	-	-	-	-	-	100	100	100	100	100	100	99.727	-	94.262	94.262	94.262		0	7	0	3		0	0	0	0	5	1	1	0	2	1
10	VFG042592(gi:46487741)	StgC [Stg fimbriae (AI047)] [Escherichia coli O78:K80:H9 chi7122]	stgC	Adherence	-	-	-	-	-	-	-	-	-	-	-	-	-	-	-	99.802	99.802	99.802	99.802	99.802	99.802	99.841	-	90.606	90.606	90.369		0	7	0	3		0	0	0	0	5	1	1	0	2	1
10	VFG045806	hypothetical protein [SCI-I T6SS (CVF734)] [Escherichia coli O25b:H4-ST131]	EC958_3099	Secretion Systems	-	100	100	100	100	100	100	100	100	100	100	-	-	-	-	-	-	-	-	-	-	-	-	-	-	-		9	0	0	0		9	0	0	0	0	0	0	0	0	0
10	VFG045808	hypothetical protein [SCI-I T6SS (CVF734)] [Escherichia coli O25b:H4-ST131]	EC958_3095	Secretion Systems	-	100	100	100	100	100	100	-	99.958	100	100	98.613	-	-	-	-	-	-	-	-	-	-	-	-	-	-		9	0	0	0		8	1	0	0	0	0	0	0	0	0
10	VFG045818	hypothetical protein [Temperature-sensitive hemagglutinin (CVF446)] [Escherichia coli O25b:H4-ST131]	EC958_4611	Unknown	-	100	100	100	100	100	100	100	100	100	100	-	-	-	-	-	-	-	-	-	-	-	-	-	-	-		9	0	0	0		9	0	0	0	0	0	0	0	0	0
9	VFG012248(gi:117625208)	minor pilin subunit PapH [P fimbriae (CVF425)] [Escherichia coli APEC O1]	papH	Adherence	-	-	98.98	98.98	98.98	98.98	98.98	98.98	98.98	98.98	98.98	-	-	-	-	-	-	-	-	-	-	-	-	-	-	-		9	0	0	0		9	0	0	0	0	0	0	0	0	0
9	VFG012354(gi:91213830)	adhesin/virulence factor Hek [Tia/Hek (CVF430)] [Escherichia coli UTI89]	tia	Adherence	-	-	100	100	100	100	100	100	100	100	100	-	-	-	-	-	-	-	-	-	-	-	-	-	-	-		9	0	0	0		9	0	0	0	0	0	0	0	0	0
9	VFG034858(gi:260853232)	T3SS effector EspX [EspX1 (CVF701)] [Escherichia coli O26:H11 str. 11368]	espX1	Virulence effector	-	-	-	-	-	-	-	-	-	-	-	-	-	-	-	99.859	99.859	99.859	99.859	99.859	99.859	99.859	94.866	-	94.444	-		0	7	1	1		0	0	0	0	5	1	1	1	1	0
9	VFG035446(gi:410484153)	hypothetical protein [ACE T6SS (CVF736)] [Escherichia coli O104:H4 str. 2009EL-2050]	aec32	Secretion Systems	-	-	-	-	-	-	-	-	-	-	-	-	-	-	-	99.586	99.586	99.586	99.586	99.586	99.793	99.586	99.793	-	-	98.344		0	7	1	1		0	0	0	0	5	1	1	1	0	1
9	VFG036040(gi:386627830)	hypothetical protein [Contact-dependent inhibition CDI system (CVF747)] [Escherichia coli str. clone D i2]	cdiB	Intra Host Survival	100	-	97.756	97.756	97.756	97.756	97.756	97.756	97.756	97.756	-	-	-	-	-	-	-	-	-	-	-	-	-	-	-	-		8	0	0	0		8	0	0	0	0	0	0	0	0	0
9	VFG042086(gi:15832975)	surface presentation of antigens protein SpaS [ETT2 (SS017)] [Escherichia coli O157:H7 str. Sakai]	epaS	Secretion Systems	-	-	-	-	-	-	-	-	-	-	-	-	-	-	-	95.602	95.602	95.602	95.602	-	97.326	96.613	-	96.435	96.435	95.811		0	6	0	3		0	0	0	0	4	1	1	0	2	1
9	VFG042403(gi:15800803)	putative fimbrial-like protein [E. coli YcbQ laminin-binding fimbriae (ELF) (AI005)] [Escherichia coli O157:H7 str. EDL933]	ycbV	Adherence	-	-	-	-	-	-	-	-	-	-	-	-	-	-	-	97.34	97.34	97.34	97.34	97.34	98.936	98.936	99.113	-	-	98.05		0	7	1	1		0	0	0	0	5	1	1	1	0	1
9	VFG042404(gi:15804987)	putativi pili assembly chaperone [E. coli YcbQ laminin-binding fimbriae (ELF) (AI005)] [Escherichia coli O157:H7 str. EDL933]	ycbF	Adherence	-	-	-	-	-	-	-	-	-	-	-	-	-	-	-	97.29	97.29	97.29	97.29	97.29	98.509	98.238	99.051	-	-	97.019		0	7	1	1		0	0	0	0	5	1	1	1	0	1
9	VFG043103(gi:15802359)	flagellar capping protein [peritrichous flagella (AI140)] [Escherichia coli O157:H7 str. EDL933]	fliD	Motility and Chemotaxis	97.228	-	-	-	-	-	-	-	-	-	-	-	-	-	-	97.37	97.37	97.37	97.37	97.37	-	97.868	-	-	97.37	97.228		0	6	0	2		0	0	0	0	5	0	1	0	1	1
9	VFG045807	hypothetical protein [SCI-I T6SS (CVF734)] [Escherichia coli O25b:H4-ST131]	EC958_3091	Secretion Systems	-	100	99.914	100	100	100	100	-	100	100	99.914	-	-	-	-	-	-	-	-	-	-	-	-	-	-	-		8	0	0	0		8	0	0	0	0	0	0	0	0	0
9	VFG045899	periplasmic pilin chaperone [E.coli laminin-binding fimbriae (ELF) (CVF824)] [Escherichia coli O78:H18 str. WS3294A]	APECO78_08685	Adherence	-	-	-	-	-	-	-	-	-	-	-	-	-	-	-	100	100	100	100	100	99.715	99.715	99.145	-	-	95.442		0	7	1	1		0	0	0	0	5	1	1	1	0	1
9	VFG045913	outer membrane usher protein FimD [E.coli laminin-binding fimbriae (ELF) (CVF824)] [Escherichia coli UMNK88]	UMNK88_1095	Adherence	-	-	-	-	-	-	-	-	-	-	-	-	-	-	-	98.2	98.2	98.2	98.2	98.2	98.474	98.592	98.631	-	-	94.562		0	7	1	1		0	0	0	0	5	1	1	1	0	1
8	VFG034623(gi:218701867)	putative adhesin major subunit pilin [CFA/I fimbriae (CVF684)] [Escherichia coli O7:K1 str. IAI39]	cfaB	Adherence	-	-	-	-	-	-	-	-	-	-	-	-	-	-	90.619	97.206	97.206	97.206	97.206	97.206	97.206	-	-	-	-	90.419		1	6	0	1		0	0	0	1	5	1	0	0	0	1
8	VFG034636(gi:157158530)	hypothetical protein [CFA/I fimbriae (CVF684)] [Escherichia coli E24377A]	cfaC	Adherence	-	-	-	-	-	-	-	-	-	-	-	-	-	-	90.055	99.852	99.852	99.852	99.852	99.852	99.926	-	-	-	-	90.018		1	6	0	1		0	0	0	1	5	1	0	0	0	1
8	VFG034823(gi:260867911)	T3SS effector-like protein EspR [EspR1 (CVF696)] [Escherichia coli O111:H- str. 11128]	espR1	Virulence effector	-	-	-	-	-	-	-	-	-	-	-	-	-	-	-	99.85	99.85	99.85	99.85	99.85	99.7	100	99.775	-	-	-		0	7	1	0		0	0	0	0	5	1	1	1	0	0
8	VFG035556(gi:222155041)	hypothetical protein [ACE T6SS (CVF736)] [Escherichia coli O83:H1 str. LF82]	aec28	Secretion Systems	-	-	-	-	-	-	-	-	-	-	-	-	99.731	99.731	99.731	-	-	-	-	-	90.897	-	90.495	94.624	94.624	91.165		3	1	1	3		0	0	2	1	0	1	0	1	2	1
8	VFG042074(gi:15832989)	hypothetical protein [ETT2 (SS017)] [Escherichia coli O157:H7 str. Sakai]	pkgA	Secretion Systems	-	-	-	-	-	-	-	-	-	-	-	-	-	-	-	98.889	98.889	98.889	98.889	98.889	-	-	-	95.556	95.556	95.556		0	5	0	3		0	0	0	0	5	0	0	0	2	1
8	VFG042080(gi:15832983)	EivI [ETT2 (SS017)] [Escherichia coli O157:H7 str. Sakai]	eivI	Secretion Systems	-	-	-	-	-	-	-	-	-	-	-	-	-	-	-	96.131	96.131	96.131	96.131	96.131	-	-	-	97.619	97.619	97.619		0	5	0	3		0	0	0	0	5	0	0	0	2	1
8	VFG042081(gi:15832984)	ATP synthase SpaL [ETT2 (SS017)] [Escherichia coli O157:H7 str. Sakai]	eivC	Secretion Systems	-	-	-	-	-	-	-	-	-	-	-	-	-	-	-	96.364	96.364	96.364	96.364	96.364	-	-	-	96.742	96.742	96.818		0	5	0	3		0	0	0	0	5	0	0	0	2	1
8	VFG042082(gi:15832981)	EivJ [ETT2 (SS017)] [Escherichia coli O157:H7 str. Sakai]	eivJ	Secretion Systems	-	-	-	-	-	-	-	-	-	-	-	-	-	-	-	96.602	96.602	96.602	96.602	96.602	-	-	-	93.204	93.204	93.042		0	5	0	3		0	0	0	0	5	0	0	0	2	1
8	VFG042085(gi:15832978)	EpaQ [ETT2 (SS017)] [Escherichia coli O157:H7 str. Sakai]	epaQ	Secretion Systems	-	-	-	-	-	-	-	-	-	-	-	-	-	-	-	-	94.636	94.636	-	94.636	96.935	96.935	-	96.552	96.552	96.552		0	5	0	3		0	0	0	0	3	1	1	0	2	1
8	VFG042402(gi:15800802)	hypothetical protein [E. coli YcbQ laminin-binding fimbriae (ELF) (AI005)] [Escherichia coli O157:H7 str. EDL933]	ycbU	Adherence	-	-	-	-	-	-	-	-	-	-	-	-	-	-	-	99.79	99.79	99.79	99.79	99.79	100	100	99.79	-	-	-		0	7	1	0		0	0	0	0	5	1	1	1	0	0
8	VFG043085(gi:15802290)	flagellar protein [peritrichous flagella (AI140)] [Escherichia coli O157:H7 str. EDL933]	flhE	Motility and Chemotaxis	-	-	-	-	-	-	-	-	-	-	-	-	-	-	-	96.947	96.947	96.947	96.947	96.947	96.947	96.947	96.947	-	-	-		0	7	1	0		0	0	0	0	5	1	1	1	0	0
8	VFG043120(gi:15802868)	flagella biosynthesis regulator [peritrichous flagella (AI140)] [Escherichia coli O157:H7 str. EDL933]	flk	Transcriptional Regulation	98.193	-	-	-	-	-	-	-	-	-	-	-	98.394	98.394	98.394	-	-	-	-	-	-	-	98.795	98.092	98.092	98.494		3	0	1	3		0	0	2	1	0	0	0	1	2	1
8	VFG045935	fimbrial-like adhesin protein [E.coli laminin-binding fimbriae (ELF) (CVF824)] [Escherichia coli O78:H18 str. WS3294A]	APECO78_08695	Adherence	-	-	-	-	-	-	-	-	-	-	-	-	-	-	-	100	100	100	100	100	99.44	99.44	97.012	-	-	-		0	7	1	0		0	0	0	0	5	1	1	1	0	0
7	VFG033146(gi:386625714)	major pilin subunit PapA [P fimbriae (CVF425)] [Escherichia coli O7:K1 str. CE10]	papA	Adherence	-	99.831	-	-	99.831	-	99.831	-	-	-	-	99.492	99.831	99.831	99.831	-	-	-	-	-	-	-	-	-	-	-		6	0	0	0		2	1	2	1	0	0	0	0	0	0
7	VFG034612(gi:157155469)	hypothetical protein [CFA/I fimbriae (CVF684)] [Escherichia coli E24377A]	cfaA	Adherence	-	-	-	-	-	-	-	-	-	-	-	-	-	-	-	99.721	99.721	99.721	99.721	99.721	99.721	99.721	-	-	-	-		0	7	0	0		0	0	0	0	5	1	1	0	0	0
7	VFG034648(gi:157157077)	pilus biogenesis initiator protein [CFA/I fimbriae (CVF684)] [Escherichia coli E24377A]	cfaD	Adherence	-	-	-	-	-	-	-	-	-	-	-	-	-	-	-	100	100	100	100	100	100	100	-	-	-	-		0	7	0	0		0	0	0	0	5	1	1	0	0	0
7	VFG034777(gi:260870723)	T3SS effector-like protein EspL [EspL4 (CVF690)] [Escherichia coli O111:H- str. 11128]	espL4	Virulence effector	-	-	-	-	-	-	-	-	-	-	-	-	-	-	-	99.937	99.937	99.937	99.937	99.937	99.048	99.302	-	-	-	-		0	7	0	0		0	0	0	0	5	1	1	0	0	0
7	VFG035850(gi:386613955)	hypothetical protein [ACE T6SS (CVF736)] [Escherichia coli UMNK88]	aec15	Secretion Systems	-	-	-	-	-	-	-	-	-	-	-	-	-	-	-	98.009	98.009	98.009	98.009	98.009	-	-	95.024	-	-	96.396		0	5	1	1		0	0	0	0	5	0	0	1	0	1
7	VFG040946(gi:157154814)	putative general secretion pathway protein YghD [gsp (SS206)] [Escherichia coli E24377A]	gspM	Secretion Systems	-	-	-	-	-	-	-	-	-	-	-	-	-	-	-	96.834	96.834	96.834	96.834	96.834	100	100	-	-	-	-		0	7	0	0		0	0	0	0	5	1	1	0	0	0
7	VFG042094(gi:15832965)	hypothetical protein [ETT2 (SS017)] [Escherichia coli O157:H7 str. Sakai]	iagB	Secretion Systems	-	-	-	-	-	-	-	-	-	-	-	-	-	-	-	94.527	94.527	94.527	94.527	94.527	94.776	99.502	-	-	-	-		0	7	0	0		0	0	0	0	5	1	1	0	0	0
7	VFG042593(gi:46487742)	StgD [Stg fimbriae (AI047)] [Escherichia coli O78:K80:H9 chi7122]	stgD	Adherence	-	-	-	-	-	-	-	-	-	-	-	-	-	-	-	99.534	99.534	99.534	99.534	99.534	99.348	99.441	-	-	-	-		0	7	0	0		0	0	0	0	5	1	1	0	0	0
7	VFG042650(gi:30524676)	PixB protein [Pix pilus (AI078)] [Escherichia coli str. X2194]	pixB	Adherence	-	-	-	-	-	-	-	-	-	-	-	-	-	-	-	98.913	98.913	98.913	98.913	98.913	99.275	-	-	-	-	99.275		0	6	0	1		0	0	0	0	5	1	0	0	0	1
7	VFG042653(gi:30524679)	PixC protein [Pix pilus (AI078)] [Escherichia coli str. X2194]	pixC	Adherence	-	-	-	-	-	-	-	-	-	-	-	-	-	-	-	97.867	97.867	97.867	97.867	97.867	97.945	-	-	-	-	98.682		0	6	0	1		0	0	0	0	5	1	0	0	0	1
7	VFG042654(gi:30524680)	PixD protein [Pix pilus (AI078)] [Escherichia coli str. X2194]	pixD	Adherence	-	-	-	-	-	-	-	-	-	-	-	-	-	-	-	98.907	98.907	98.907	98.907	98.907	98.907	-	-	-	-	98.907		0	6	0	1		0	0	0	0	5	1	0	0	0	1
7	VFG042655(gi:30524681)	PixJ protein [Pix pilus (AI078)] [Escherichia coli str. X2194]	pixJ	Adherence	-	-	-	-	-	-	-	-	-	-	-	-	-	-	-	99.645	99.645	99.645	99.645	99.645	99.645	-	-	-	-	99.291		0	6	0	1		0	0	0	0	5	1	0	0	0	1
7	VFG042656(gi:30524682)	PixF protein [Pix pilus (AI078)] [Escherichia coli str. X2194]	pixF	Adherence	-	-	-	-	-	-	-	-	-	-	-	-	-	-	-	98.854	98.854	98.854	98.854	98.854	99.018	-	-	-	-	98.691		0	6	0	1		0	0	0	0	5	1	0	0	0	1
7	VFG042657(gi:30524683)	PixG protein [Pix pilus (AI078)] [Escherichia coli str. X2194]	pixG	Adherence	-	-	-	-	-	-	-	-	-	-	-	-	-	-	-	99.194	99.194	99.194	99.194	99.194	99.094	-	-	-	-	99.597		0	6	0	1		0	0	0	0	5	1	0	0	0	1
7	VFG045811	hypothetical protein [SCI-I T6SS (CVF734)] [Escherichia coli O25b:H4-ST131]	EC958_0641	Secretion Systems	-	100	-	100	-	100	100	100	-	93.601	-	99.851	-	-	-	-	-	-	-	-	-	-	-	-	-	-		6	0	0	0		5	1	0	0	0	0	0	0	0	0
7	VFG045867	fimbrial-like adhesin protein [E.coli laminin-binding fimbriae (ELF) (CVF824)] [Escherichia coli O26:H11 str. 11368]	ycbQ	Adherence	-	-	-	-	-	-	-	-	-	-	-	-	-	-	-	99.638	99.638	99.638	99.638	99.638	99.819	99.819	-	-	-	-		0	7	0	0		0	0	0	0	5	1	1	0	0	0
7	VFG046101	Enterotoxin TieB protein [Enterotoxin SenB/TieB (CVF755)] [Escherichia coli VR50]	senB	Toxin	-	-	100	100	100	100	-	-	-	-	-	-	100	-	-	-	-	-	-	-	-	-	100	100	-	-		5	0	1	1		4	0	1	0	0	0	0	1	1	0
6	VFG033917(gi:386598810)	IroE [Salmochelin siderophore (CVF456)] [Escherichia coli O18:K1:H7 str. IHE3034]	iroE	Iron Uptake	99.373	-	-	-	-	-	-	-	-	-	-	-	-	-	-	99.373	99.373	99.373	99.373	99.373	-	-	-	-	-	-		0	5	0	0		0	0	0	0	5	0	0	0	0	0
6	VFG033923(gi:386598811)	IroD protein [Salmochelin siderophore (CVF456)] [Escherichia coli O18:K1:H7 str. IHE3034]	iroD	Iron Uptake	99.756	-	-	-	-	-	-	-	-	-	-	-	-	-	-	99.106	99.106	99.106	99.106	99.106	-	-	-	-	-	-		0	5	0	0		0	0	0	0	5	0	0	0	0	0
6	VFG033930(gi:386605041)	hypothetical protein [Salmochelin siderophore (CVF456)] [Escherichia coli UM146]	iroC	Iron Uptake	99.208	-	-	-	-	-	-	-	-	-	-	-	-	-	-	99.945	99.945	99.945	99.945	99.945	-	-	-	-	-	-		0	5	0	0		0	0	0	0	5	0	0	0	0	0
6	VFG035891(gi:387605712)	hypothetical protein [ACE T6SS (CVF736)] [Escherichia coli O44:H18 042]	aec7	Secretion Systems	96.881	-	-	-	-	-	-	-	-	-	-	-	98.441	98.441	98.441	-	-	-	-	-	-	-	-	100	100	-		3	0	0	2		0	0	2	1	0	0	0	0	2	0
6	VFG043086(gi:15802291)	flagellar biosynthesis protein FlhA [peritrichous flagella (AI140)] [Escherichia coli O157:H7 str. EDL933]	flhA	Motility and Chemotaxis	-	-	-	-	-	-	-	-	-	-	-	-	96.008	96.008	96.008	-	-	-	-	-	-	-	-	97.21	97.258	97.595		3	0	0	3		0	0	2	1	0	0	0	0	2	1
6	VFG044334(gi:238895531)	outer membrane receptor FepA [Salmochelin (IA015)] [Klebsiella pneumoniae subsp. pneumoniae NTUH-K2044]	iroN	Iron Uptake	90.909	-	-	-	-	-	-	-	-	-	-	-	-	-	-	91.047	91.047	91.047	91.047	91.047	-	-	-	-	-	-		0	5	0	0		0	0	0	0	5	0	0	0	0	0
6	VFG045823	AIDA-I type autotransporter protein [UpaH, AIDA-I type (CVF741)] [Escherichia coli O25b:H4-ST131]	upaH	Adherence	-	100	-	100	100	100	100	-	100	-	-	-	-	-	-	-	-	-	-	-	-	-	-	-	-	-		5	0	0	0		5	0	0	0	0	0	0	0	0	0
5	VFG033935(gi:386598813)	IroB protein [Salmochelin siderophore (CVF456)] [Escherichia coli O18:K1:H7 str. IHE3034]	iroB	Iron Uptake	-	-	-	-	-	-	-	-	-	-	-	-	-	-	-	99.91	99.91	99.91	99.91	99.91	-	-	-	-	-	-		0	5	0	0		0	0	0	0	5	0	0	0	0	0
5	VFG035482(gi:222155038)	hypothetical protein [ACE T6SS (CVF736)] [Escherichia coli O83:H1 str. LF82]	aec31	Secretion Systems	-	-	-	-	-	-	-	-	-	-	-	-	99.558	99.558	99.632	-	-	-	-	-	-	-	-	95.07	95.07	-		3	0	0	2		0	0	2	1	0	0	0	0	2	0
5	VFG035507(gi:387615561)	IcmF-like protein [ACE T6SS (CVF736)] [Escherichia coli O83:H1 str. NRG 857C]	aec30	Secretion Systems	-	-	-	-	-	-	-	-	-	-	-	-	98.98	98.98	98.98	-	-	-	-	-	-	-	-	96.315	96.315	-		3	0	0	2		0	0	2	1	0	0	0	0	2	0
5	VFG035530(gi:222155040)	hypothetical protein [ACE T6SS (CVF736)] [Escherichia coli O83:H1 str. LF82]	aec29	Secretion Systems	-	-	-	-	-	-	-	-	-	-	-	-	99.931	99.931	99.931	-	-	-	-	-	-	-	-	98.129	98.06	-		3	0	0	2		0	0	2	1	0	0	0	0	2	0
5	VFG035587(gi:117622506)	hypothetical protein [AEC (SS184)] [Escherichia coli APEC O1]	aec26	Secretion Systems	-	-	-	-	-	-	-	-	-	-	-	-	100	100	100	-	-	-	-	-	-	-	-	95.948	95.948	-		3	0	0	2		0	0	2	1	0	0	0	0	2	0
5	VFG035633(gi:222155044)	hypothetical protein [ACE T6SS (CVF736)] [Escherichia coli O83:H1 str. LF82]	aec25	Secretion Systems	-	-	-	-	-	-	-	-	-	-	-	-	99.926	99.926	99.926	-	-	-	-	-	-	-	-	97.253	97.253	-		3	0	0	2		0	0	2	1	0	0	0	0	2	0
5	VFG035659(gi:222155045)	hypothetical protein [ACE T6SS (CVF736)] [Escherichia coli O83:H1 str. LF82]	aec24	Secretion Systems	-	-	-	-	-	-	-	-	-	-	-	-	99.238	99.238	99.238	-	-	-	-	-	-	-	-	97.333	97.333	-		3	0	0	2		0	0	2	1	0	0	0	0	2	0
5	VFG035685(gi:387615568)	hypothetical protein [ACE T6SS (CVF736)] [Escherichia coli O83:H1 str. NRG 857C]	aec23	Secretion Systems	-	-	-	-	-	-	-	-	-	-	-	-	99.149	99.149	98.995	-	-	-	-	-	-	-	-	99.304	99.304	-		3	0	0	2		0	0	2	1	0	0	0	0	2	0
5	VFG035708(gi:222155047)	hypothetical protein [ACE T6SS (CVF736)] [Escherichia coli O83:H1 str. LF82]	aec22	Secretion Systems	-	-	-	-	-	-	-	-	-	-	-	-	99.048	99.048	99.048	-	-	-	-	-	-	-	-	98.286	98.286	-		3	0	0	2		0	0	2	1	0	0	0	0	2	0
5	VFG035733(gi:222155048)	hypothetical protein [ACE T6SS (CVF736)] [Escherichia coli O83:H1 str. LF82]	LF82_024	Secretion Systems	-	-	-	-	-	-	-	-	-	-	-	-	97.828	97.828	97.828	-	-	-	-	-	-	-	-	95.277	95.277	-		3	0	0	2		0	0	2	1	0	0	0	0	2	0
5	VFG035755(gi:218557165)	hypothetical protein [ACE T6SS (CVF736)] [Escherichia coli O45:K1:H7 str. S88]	aec19	Secretion Systems	-	-	-	-	-	-	-	-	-	-	-	-	99.765	99.765	99.531	-	-	-	-	-	-	-	-	96.479	96.479	-		3	0	0	2		0	0	2	1	0	0	0	0	2	0
5	VFG035774(gi:387605700)	putative type VI secretion system protein [ACE T6SS (CVF736)] [Escherichia coli O44:H18 042]	aec18	Secretion Systems	-	-	-	-	-	-	-	-	-	-	-	-	96.094	96.094	96.094	-	-	-	-	-	-	-	-	100	100	-		3	0	0	2		0	0	2	1	0	0	0	0	2	0
5	VFG035803(gi:218557167)	hypothetical protein [ACE T6SS (CVF736)] [Escherichia coli O45:K1:H7 str. S88]	aec17	Secretion Systems	-	-	-	-	-	-	-	-	-	-	-	-	99.82	99.82	99.82	-	-	-	-	-	-	-	-	98.198	98.378	-		3	0	0	2		0	0	2	1	0	0	0	0	2	0
5	VFG035824(gi:387605702)	putative type VI secretion system protein [ACE T6SS (CVF736)] [Escherichia coli O44:H18 042]	aec16	Secretion Systems	-	-	-	-	-	-	-	-	-	-	-	-	98.459	98.459	98.459	-	-	-	-	-	-	-	-	100	100	-		3	0	0	2		0	0	2	1	0	0	0	0	2	0
5	VFG035886(gi:222155062)	hypothetical protein [ACE T6SS (CVF736)] [Escherichia coli O83:H1 str. LF82]	aec8	Secretion Systems	-	-	-	-	-	-	-	-	-	-	-	-	99.603	99.603	99.603	-	-	-	-	-	-	-	-	99.405	99.405	-		3	0	0	2		0	0	2	1	0	0	0	0	2	0
5	VFG043980(gi:73476856)	Colicin IB [colicin Ib (TX383)] [Escherichia coli O113:H21 str. EH41]	cib	Toxin	-	-	-	-	-	-	-	-	-	-	-	-	-	-	-	99.256	99.256	99.256	99.256	-	-	98.884	-	-	-	-		0	5	0	0		0	0	0	0	4	0	1	0	0	0
4	VFG033877(gi:386617332)	hemolysin secretion protein HlyD [Alpha-hemolysin (CVF453)] [Escherichia coli UMNK88]	hlyD	Toxin	96.66	-	-	-	-	-	-	96.66	96.66	96.66	-	-	-	-	-	-	-	-	-	-	-	-	-	-	-	-		3	0	0	0		3	0	0	0	0	0	0	0	0	0
4	VFG033885(gi:386617331)	hemolysin translocation ATP-binding protein HlyB [Alpha-hemolysin (CVF453)] [Escherichia coli UMNK88]	hlyB	Toxin	98.07	-	-	-	-	-	-	98.07	98.07	98.07	-	-	-	-	-	-	-	-	-	-	-	-	-	-	-	-		3	0	0	0		3	0	0	0	0	0	0	0	0	0
4	VFG033893(gi:386617330)	hemolysin structural protein HlyA [Alpha-hemolysin (CVF453)] [Escherichia coli UMNK88]	hlyA	Toxin	97.106	-	-	-	-	-	-	97.138	97.138	97.138	-	-	-	-	-	-	-	-	-	-	-	-	-	-	-	-		3	0	0	0		3	0	0	0	0	0	0	0	0	0
4	VFG033902(gi:386606910)	hemolysin-activating lysine-acyltransferase HlyC [Alpha-hemolysin (CVF453)] [Escherichia coli UM146]	hlyC	Toxin	99.683	-	-	-	-	-	-	99.683	99.683	99.683	-	-	-	-	-	-	-	-	-	-	-	-	-	-	-	-		3	0	0	0		3	0	0	0	0	0	0	0	0	0
4	VFG035167(gi:222157504)	hypothetical protein [SCI-I T6SS (CVF734)] [Escherichia coli O83:H1 str. LF82]	LF82_430	Secretion Systems	99.637	-	-	-	-	-	-	-	-	-	-	-	95.039	95.039	95.039	-	-	-	-	-	-	-	-	-	-	-		3	0	0	0		0	0	2	1	0	0	0	0	0	0
4	VFG035241(gi:260845471)	hypothetical protein [SCI-I T6SS (CVF734)] [Escherichia coli O103:H2 str. 12009]	ECO103_3368	Secretion Systems	-	-	-	-	-	-	-	-	-	-	-	95.05	95.856	95.856	95.856	-	-	-	-	-	-	-	-	-	-	-		4	0	0	0		0	1	2	1	0	0	0	0	0	0
4	VFG035583(gi:387615564)	putative ATP-dependent Clp proteinase Aec27 ATP-binding chain, with chaperone activity [ACE T6SS (CVF736)] [Escherichia coli O83:H1 str. NRG 857C]	aec27/clpV	Secretion Systems	-	-	-	-	-	-	-	-	-	-	-	-	99.674	99.674	99.674	-	-	-	-	-	-	-	-	-	91.278	-		3	0	0	1		0	0	2	1	0	0	0	0	1	0
4	VFG041049(gi:15799912)	hypothetical protein [EHS (SS185)] [Escherichia coli O157:H7 str. EDL933]	Z0263	Unknown	-	-	-	-	-	-	-	-	-	-	-	-	-	-	-	-	-	-	-	-	100	91.556	100	-	-	99.556		0	2	1	1		0	0	0	0	0	1	1	1	0	1
4	VFG041050(gi:15799914)	hypothetical protein [EHS (SS185)] [Escherichia coli O157:H7 str. EDL933]	Z0265	Unknown	-	-	-	-	-	-	-	-	-	-	-	-	-	-	-	-	-	-	-	-	99.306	99.306	99.306	-	-	98.611		0	2	1	1		0	0	0	0	0	1	1	1	0	1
4	VFG042087(gi:15832973)	EprH [ETT2 (SS017)] [Escherichia coli O157:H7 str. Sakai]	eprH	Secretion Systems	-	-	-	-	-	-	-	-	-	-	-	-	-	-	-	-	97.143	97.143	97.143	-	-	96.599	-	-	-	-		0	4	0	0		0	0	0	0	3	0	1	0	0	0
4	VFG044067(gi:218534572)	Colicin-Ia [colicin Ia (TX382)] [Escherichia coli O45:K1:H7 str. S88]	pECS88_0104	Toxin	-	-	-	-	-	-	-	-	-	-	-	-	-	-	-	99.947	-	99.947	99.947	99.841	-	-	-	-	-	-		0	4	0	0		0	0	0	0	4	0	0	0	0	0
3	VFG001445(gi:150860)	TraJ [TraJ (VF0241)] [Escherichia coli]	traJ	Transcriptional Regulation	-	99.835	-	-	-	-	-	-	-	-	-	-	-	-	-	-	-	-	-	-	-	-	-	99.835	-	98.845		0	0	0	2		0	0	0	0	0	0	0	0	1	1
3	VFG033818(gi:222155089)	Haemoglobin protease [Vacuolating autotransporter gene (CVF445)] [Escherichia coli O83:H1 str. LF82]	vat	Toxin	99.976	-	-	-	-	-	-	-	-	-	-	-	99.661	99.661	-	-	-	-	-	-	-	-	-	-	-	-		2	0	0	0		0	0	2	0	0	0	0	0	0	0
3	VFG033904(gi:386606905)	cytotoxic necrotizing factor 2 protein Cnf2 [Cytotoxic necrotizing factor 1 (CVF454)] [Escherichia coli UM146]	cnf1	Toxin	-	-	-	-	-	-	-	100	100	100	-	-	-	-	-	-	-	-	-	-	-	-	-	-	-	-		3	0	0	0		3	0	0	0	0	0	0	0	0	0
3	VFG034899(gi:254791195)	non-LEE-encoded type III effector [EspY1 (CVF707)] [Escherichia coli O157:H7 str. TW14359]	espY1	Virulence effector	-	-	-	-	-	-	-	-	-	-	-	-	-	-	-	-	-	-	-	-	-	-	-	90.379	90.379	92.696		0	0	0	3		0	0	0	0	0	0	0	0	2	1
3	VFG035863(gi:387615577)	hypothetical protein [ACE T6SS (CVF736)] [Escherichia coli O83:H1 str. NRG 857C]	aec14	Secretion Systems	-	-	-	-	-	-	-	-	-	-	-	-	99.747	99.747	99.747	-	-	-	-	-	-	-	-	-	-	-		3	0	0	0		0	0	2	1	0	0	0	0	0	0
3	VFG035869(gi:386605799)	hypothetical protein [ACE T6SS (CVF736)] [Escherichia coli UM146]	UM146_16140	Secretion Systems	-	-	-	-	-	-	-	-	-	-	-	-	99.812	99.812	99.812	-	-	-	-	-	-	-	-	-	-	-		3	0	0	0		0	0	2	1	0	0	0	0	0	0
3	VFG035872(gi:110640451)	hypothetical protein [ACE T6SS (CVF736)] [Escherichia coli 536]	aec11	Secretion Systems	-	-	-	-	-	-	-	-	-	-	-	-	100	100	100	-	-	-	-	-	-	-	-	-	-	-		3	0	0	0		0	0	2	1	0	0	0	0	0	0
3	VFG035939(gi:386626557)	hypothetical protein [ACE T6SS (CVF736)] [Escherichia coli 536]	air/eaeX	Adherence	-	-	-	-	-	-	-	-	-	-	-	-	-	-	-	-	-	-	-	-	-	-	-	95.376	95.376	97.634		0	0	0	3		0	0	0	0	0	0	0	0	2	1
3	VFG042073(gi:15832988)	EivF [ETT2 (SS017)] [Escherichia coli O157:H7 str. Sakai]	eivF	Secretion Systems	-	-	-	-	-	-	-	-	-	-	-	-	-	-	-	-	-	-	-	-	-	-	-	98.667	98.667	98.667		0	0	0	3		0	0	0	0	0	0	0	0	2	1
3	VFG042077(gi:15832986)	EivE [ETT2 (SS017)] [Escherichia coli O157:H7 str. Sakai]	eivE	Secretion Systems	-	-	-	-	-	-	-	-	-	-	-	-	-	-	-	-	-	-	-	-	-	-	-	97.12	97.12	96.946		0	0	0	3		0	0	0	0	0	0	0	0	2	1
3	VFG042078(gi:15832985)	EivA [ETT2 (SS017)] [Escherichia coli O157:H7 str. Sakai]	eivA	Secretion Systems	-	-	-	-	-	-	-	-	-	-	-	-	-	-	-	-	-	-	-	-	-	-	-	97.331	97.331	97.283		0	0	0	3		0	0	0	0	0	0	0	0	2	1
3	VFG042079(gi:15832982)	hypothetical protein [ETT2 (SS017)] [Escherichia coli O157:H7 str. Sakai]	ECs3728	Secretion Systems	-	-	-	-	-	-	-	-	-	-	-	-	-	-	-	96.154	-	-	96.154	-	-	-	-	93.162	-	-		0	2	0	1		0	0	0	0	2	0	0	0	1	0
3	VFG042652(gi:30524678)	PixH protein [Pix pilus (AI078)] [Escherichia coli str. X2194]	pixH	Adherence	-	-	-	-	-	-	-	-	-	-	-	-	-	-	-	-	-	-	95.578	-	97.789	-	-	-	-	98.129		0	2	0	1		0	0	0	0	1	1	0	0	0	1
3	VFG046082	hypothetical protein [ACE T6SS (CVF736)] [Escherichia coli VR50]	ECVR50_0238	Secretion Systems	-	-	-	-	-	-	-	-	-	-	-	-	-	-	-	-	-	-	-	-	99.704	-	99.926	-	-	96.822		0	1	1	1		0	0	0	0	0	1	0	1	0	1
3	VFG046090	hypothetical protein [ACE T6SS (CVF736)] [Escherichia coli VR50]	ECVR50_0246	Secretion Systems	-	-	-	-	-	-	-	-	-	-	-	-	-	-	-	-	-	-	-	-	99.693	-	99.846	-	-	97.696		0	1	1	1		0	0	0	0	0	1	0	1	0	1
3	VFG046091	hypothetical protein [ACE T6SS (CVF736)] [Escherichia coli VR50]	ECVR50_0247	Secretion Systems	-	-	-	-	-	-	-	-	-	-	-	-	-	-	-	-	-	-	-	-	99.538	-	99.815	-	-	97.415		0	1	1	1		0	0	0	0	0	1	0	1	0	1
3	VFG046092	hypothetical protein [ACE T6SS (CVF736)] [Escherichia coli VR50]	ECVR50_0248	Secretion Systems	-	-	-	-	-	-	-	-	-	-	-	-	-	-	-	-	-	-	-	-	97.623	-	100	-	-	97.893		0	1	1	1		0	0	0	0	0	1	0	1	0	1
3	VFG046093	hypothetical protein [ACE T6SS (CVF736)] [Escherichia coli VR50]	ECVR50_0249	Secretion Systems	-	-	-	-	-	-	-	-	-	-	-	-	-	-	-	-	-	-	-	-	95.894	-	99.758	-	-	96.377		0	1	1	1		0	0	0	0	0	1	0	1	0	1
3	VFG046094	uncharacterized protein ImpC [ACE T6SS (CVF736)] [Escherichia coli VR50]	ECVR50_0250	Secretion Systems	-	-	-	-	-	-	-	-	-	-	-	-	-	-	-	-	-	-	-	-	97.493	-	99.932	-	-	98.442		0	1	1	1		0	0	0	0	0	1	0	1	0	1
3	VFG046096	hypothetical protein [ACE T6SS (CVF736)] [Escherichia coli VR50]	ECVR50_0257	Secretion Systems	-	-	-	-	-	-	-	-	-	-	-	-	-	-	-	-	-	-	-	-	97.183	-	100	-	-	97.183		0	1	1	1		0	0	0	0	0	1	0	1	0	1
2	VFG001449(gb|AAA24047)	KpsT [K1 capsule (VF0239)] [Escherichia coli O18:K1:H7 str. RS218]	kpsT	Intra Host Survival	-	-	-	-	-	-	-	-	-	-	-	-	100	100	-	-	-	-	-	-	-	-	-	-	-	-		2	0	0	0		0	0	2	0	0	0	0	0	0	0
2	VFG034372(gi:386622089)	Putative iron regulated outer membrane virulence protein [Iron-regulated element (CVF461)] [Escherichia coli NA114]	ireA	Iron Uptake	99.854	-	-	-	-	-	-	-	-	-	-	-	-	-	99.951	-	-	-	-	-	-	-	-	-	-	-		1	0	0	0		0	0	0	1	0	0	0	0	0	0
2	VFG034911(gi:387505433)	hypothetical protein [EspY3 (CVF709)] [Escherichia coli O55:H7 str. RM12579]	espY3	Virulence effector	-	-	-	-	-	-	-	-	-	-	-	-	-	-	-	-	-	-	-	-	-	-	-	95.802	95.802	-		0	0	0	2		0	0	0	0	0	0	0	0	2	0
2	VFG034921(gi:387884949)	hypothetical protein [EspY4 (CVF710)] [Escherichia coli O157:H7 str. Xuzhou21]	espY4	Virulence effector	-	-	-	-	-	-	-	-	-	-	-	-	-	-	-	-	-	-	-	-	-	-	-	96.266	96.266	-		0	0	0	2		0	0	0	0	0	0	0	0	2	0
2	VFG035989(gi:157158257)	outer membrane autotransporter [EhaA, AIDA-I type (CVF743)] [Escherichia coli E24377A]	ehaA	Adherence	-	-	-	-	-	-	-	-	-	-	-	-	-	-	-	-	-	-	-	-	99.849	99.849	-	-	-	-		0	2	0	0		0	0	0	0	0	1	1	0	0	0
2	VFG041000(gi:284924296)	conserved hypothetical protein [AAI/SCI-II (SS182)] [Escherichia coli O44:H18 042]	aaiT	Unknown	-	-	-	-	-	-	-	-	-	-	-	95.767	-	-	-	-	-	-	-	-	-	-	-	95.767	-	-		1	0	0	1		0	1	0	0	0	0	0	0	1	0
2	VFG041003(gi:284924301)	transposase [AAI/SCI-II (SS182)] [Escherichia coli O44:H18 042]	aaiW	Unknown	97.707	-	-	-	-	-	-	-	-	-	-	-	-	-	-	-	-	-	-	-	-	-	-	97.795	-	-		0	0	0	1		0	0	0	0	0	0	0	0	1	0
2	VFG041051(gi:15799916)	hypothetical protein [EHS (SS185)] [Escherichia coli O157:H7 str. EDL933]	vgrG	Unknown	-	-	-	-	-	-	-	-	-	-	-	-	-	-	-	-	-	-	-	-	97.246	-	98.039	-	-	-		0	1	1	0		0	0	0	0	0	1	0	1	0	0
2	VFG042076(gi:15832987)	EivG [ETT2 (SS017)] [Escherichia coli O157:H7 str. Sakai]	eivG	Secretion Systems	-	-	-	-	-	-	-	-	-	-	-	-	-	-	-	-	-	-	-	-	-	-	-	-	96.948	97.124		0	0	0	2		0	0	0	0	0	0	0	0	1	1
2	VFG042096(gi:15832962)	hypothetical protein [ETT2 (SS017)] [Escherichia coli O157:H7 str. Sakai]	ygeG	Secretion Systems	-	-	-	-	-	-	-	-	-	-	-	-	-	-	-	-	-	-	-	-	-	-	-	96.545	96.545	-		0	0	0	2		0	0	0	0	0	0	0	0	2	0
2	VFG045810	hypothetical protein [SCI-I T6SS (CVF734)] [Escherichia coli O25b:H4-ST131]	EC958_0640	Secretion Systems	-	100	-	-	-	100	-	-	-	-	-	-	-	-	-	-	-	-	-	-	-	-	-	-	-	-		1	0	0	0		1	0	0	0	0	0	0	0	0	0
2	VFG045875	major type 1 subunit fimbrin FimA [E.coli laminin-binding fimbriae (ELF) (CVF824)] [Escherichia coli UMNK88]	UMNK88_1093	Adherence	-	-	-	-	-	-	-	-	-	-	-	-	-	-	-	-	-	-	-	-	-	-	99.63	-	-	92.037		0	0	1	1		0	0	0	0	0	0	0	1	0	1
2	VFG046083	IcmF-related protein [ACE T6SS (CVF736)] [Escherichia coli VR50]	ECVR50_0239	Secretion Systems	-	-	-	-	-	-	-	-	-	-	-	-	-	-	-	-	-	-	-	-	99.192	-	-	-	-	96.508		0	1	0	1		0	0	0	0	0	1	0	0	0	1
2	VFG046084	uncharacterized protein ImpA [ACE T6SS (CVF736)] [Escherichia coli VR50]	ECVR50_0240	Secretion Systems	-	-	-	-	-	-	-	-	-	-	-	-	-	-	-	-	-	-	-	-	99.717	-	99.858	-	-	-		0	1	1	0		0	0	0	0	0	1	0	1	0	0
2	VFG046086	putative protease [ACE T6SS (CVF736)] [Escherichia coli VR50]	ECVR50_0242	Secretion Systems	-	-	-	-	-	-	-	-	-	-	-	-	-	-	-	-	-	-	-	-	-	-	99.964	-	-	93.962		0	0	1	1		0	0	0	0	0	0	0	1	0	1
1	VFG000859(gb|YP_006098866)	toxin subunit Set1A [ShET1 (VF0219)] [Escherichia coli O44:H18 042]	set1A	Toxin	94.382	-	-	-	-	-	-	-	-	-	-	-	-	-	-	-	-	-	-	-	-	-	-	-	-	-		0	0	0	0		0	0	0	0	0	0	0	0	0	0
1	VFG000860(gb|YP_006098865)	toxin subunit Set1B [ShET1 (VF0219)] [Escherichia coli O44:H18 042]	set1B	Toxin	98.387	-	-	-	-	-	-	-	-	-	-	-	-	-	-	-	-	-	-	-	-	-	-	-	-	-		0	0	0	0		0	0	0	0	0	0	0	0	0	0
1	VFG000914(gb|NP_753158)	F1C minor fimbrial subunit protein G presursor [F1C fimbriae (VF0224)] [Escherichia coli CFT073]	focG	Adherence	100	-	-	-	-	-	-	-	-	-	-	-	-	-	-	-	-	-	-	-	-	-	-	-	-	-		0	0	0	0		0	0	0	0	0	0	0	0	0	0
1	VFG012335(gb|YP_540126)	S fimbriae periplasmic chaperone SfaE [S fimbriae (VF0222)] [Escherichia coli UTI89]	sfaE	Adherence	98.707	-	-	-	-	-	-	-	-	-	-	-	-	-	-	-	-	-	-	-	-	-	-	-	-	-		0	0	0	0		0	0	0	0	0	0	0	0	0	0
1	VFG012936(gi:110804319)	bactoprenol-linked glucose translocase [LPS glucosylation (CVF473)] [Shigella flexneri 5 str. 8401]	gtrA	Unknown	-	-	-	-	-	-	-	-	-	-	-	-	-	-	-	-	-	-	-	-	-	-	-	-	90.358	-		0	0	0	1		0	0	0	0	0	0	0	0	1	0
1	VFG033388(gi:386605050)	F1C fimbrial usher [S fimbriae (CVF427)] [Escherichia coli UM146]	sfaF	Adherence	99.544	-	-	-	-	-	-	-	-	-	-	-	-	-	-	-	-	-	-	-	-	-	-	-	-	-		0	0	0	0		0	0	0	0	0	0	0	0	0	0
1	VFG033395(gi:386638426)	S fimbrial adhesin major subunit SfaA [F1C fimbriae (CVF428)] [Escherichia coli ABU 83972]	focA	Adherence	99.816	-	-	-	-	-	-	-	-	-	-	-	-	-	-	-	-	-	-	-	-	-	-	-	-	-		0	0	0	0		0	0	0	0	0	0	0	0	0	0
1	VFG033397(gi:386638427)	minor F1C fimbrial subunit SfaD [F1C fimbriae (CVF428)] [Escherichia coli ABU 83972]	focI	Adherence	100	-	-	-	-	-	-	-	-	-	-	-	-	-	-	-	-	-	-	-	-	-	-	-	-	-		0	0	0	0		0	0	0	0	0	0	0	0	0	0
1	VFG033403(gi:386638500)	S-fimbrial adhesin protein SfaG [F1C fimbriae (CVF428)] [Escherichia coli ABU 83972]	focF	Adherence	99.621	-	-	-	-	-	-	-	-	-	-	-	-	-	-	-	-	-	-	-	-	-	-	-	-	-		0	0	0	0		0	0	0	0	0	0	0	0	0	0
1	VFG033407(gi:386638502)	S-fimbrial adhesin protein SfaH [F1C fimbriae (CVF428)] [Escherichia coli ABU 83972]	focH	Adherence	100	-	-	-	-	-	-	-	-	-	-	-	-	-	-	-	-	-	-	-	-	-	-	-	-	-		0	0	0	0		0	0	0	0	0	0	0	0	0	0
1	VFG033831(gi:218697865)	Serine protease pic precursor (ShMu) [Pic (CVF449)] [Escherichia coli 55989]	pic	Intra Host Survival	96.99	-	-	-	-	-	-	-	-	-	-	-	-	-	-	-	-	-	-	-	-	-	-	-	-	-		0	0	0	0		0	0	0	0	0	0	0	0	0	0
1	VFG034901(gb|NP_285765)	Type III secretion system effector EspY2 [LEE encoded T3SS (SS020)] [Escherichia coli O157:H7 str. EDL933]	espY2	Virulence effector	-	-	-	-	-	-	-	-	-	-	-	-	-	-	-	-	-	-	-	-	-	-	-	-	-	94.035		0	0	0	1		0	0	0	0	0	0	0	0	0	1
1	VFG035087(gi:260845460)	hypothetical protein [SCI-I T6SS (CVF734)] [Escherichia coli O103:H2 str. 12009]	ECO103_3357	Secretion Systems	-	-	-	-	-	-	-	-	-	-	-	-	-	-	-	-	-	-	-	-	-	98.826	-	-	-	-		0	1	0	0		0	0	0	0	0	0	1	0	0	0
1	VFG035211(gi:386640301)	VGR-related protein [SCI-I T6SS (CVF734)] [Escherichia coli ABU 83972]	ECABU_c30960	Secretion Systems	100	-	-	-	-	-	-	-	-	-	-	-	-	-	-	-	-	-	-	-	-	-	-	-	-	-		0	0	0	0		0	0	0	0	0	0	0	0	0	0
1	VFG035234(gi:387618091)	hypothetical protein [SCI-I T6SS (CVF734)] [Escherichia coli O83:H1 str. NRG 857C]	NRG857_13835	Secretion Systems	100	-	-	-	-	-	-	-	-	-	-	-	-	-	-	-	-	-	-	-	-	-	-	-	-	-		0	0	0	0		0	0	0	0	0	0	0	0	0	0
1	VFG035250(gi:222157512)	hypothetical protein [SCI-I T6SS (CVF734)] [Escherichia coli O83:H1 str. LF82]	LF82_438	Secretion Systems	97.604	-	-	-	-	-	-	-	-	-	-	-	-	-	-	-	-	-	-	-	-	-	-	-	-	-		0	0	0	0		0	0	0	0	0	0	0	0	0	0
1	VFG035339(gi:387609969)	hypothetical protein [SCI-I T6SS (CVF734)] [Escherichia coli O44:H18 042]	EC042_4548	Secretion Systems	-	-	-	-	-	-	-	-	-	-	-	-	-	-	-	-	-	-	-	-	-	-	-	95.025	-	-		0	0	0	1		0	0	0	0	0	0	0	0	1	0
1	VFG036031(gi:26246247)	ShlA/HecA/FhaA exofamily protein [Contact-dependent inhibition CDI system (CVF747)] [Escherichia coli CFT073]	cdiA	Intra Host Survival	100	-	-	-	-	-	-	-	-	-	-	-	-	-	-	-	-	-	-	-	-	-	-	-	-	-		0	0	0	0		0	0	0	0	0	0	0	0	0	0
1	VFG041048(gi:15799901)	hypothetical protein [EHS (SS185)] [Escherichia coli O157:H7 str. EDL933]	Z0252	Unknown	-	-	-	-	-	-	-	-	-	-	-	-	-	-	-	-	-	-	-	-	-	-	-	-	-	90.385		0	0	0	1		0	0	0	0	0	0	0	0	0	1
1	VFG042446(gb|ABU51870)	DaaC usher protein [F1845 fimbrial adhesin (AI016)] [Escherichia coli str. C1845]	daaC	Adherence	-	97.384	-	-	-	-	-	-	-	-	-	-	-	-	-	-	-	-	-	-	-	-	-	-	-	-		0	0	0	0		0	0	0	0	0	0	0	0	0	0
1	VFG042447(gb|AAA23662)	DaaF protein [F1845 fimbrial adhesin (AI016)] [Escherichia coli str. C1845]	daaF	Adherence	-	98.684	-	-	-	-	-	-	-	-	-	-	-	-	-	-	-	-	-	-	-	-	-	-	-	-		0	0	0	0		0	0	0	0	0	0	0	0	0	0
1	VFG042567(gi:26247112)	putative F1C and S fimbrial switch regulatory protein [F1C pili (AI043)] [Escherichia coli CFT073]	focB	Adherence	100	-	-	-	-	-	-	-	-	-	-	-	-	-	-	-	-	-	-	-	-	-	-	-	-	-		0	0	0	0		0	0	0	0	0	0	0	0	0	0
1	VFG042568(gi:26247120)	hypothetical protein [F1C pili (AI043)] [Escherichia coli CFT073]	focY	Adherence	100	-	-	-	-	-	-	-	-	-	-	-	-	-	-	-	-	-	-	-	-	-	-	-	-	-		0	0	0	0		0	0	0	0	0	0	0	0	0	0
1	VFG043678(gi:112292703)	putative thioesterase [colibactin (TX033)] [Escherichia coli O18:K1:H7 str. IHE3034]	clbQ	Toxin	100	-	-	-	-	-	-	-	-	-	-	-	-	-	-	-	-	-	-	-	-	-	-	-	-	-		0	0	0	0		0	0	0	0	0	0	0	0	0	0
1	VFG043679(gi:112292704)	putative penicillin binding protein [colibactin (TX033)] [Escherichia coli O18:K1:H7 str. IHE3034]	clbP	Toxin	100	-	-	-	-	-	-	-	-	-	-	-	-	-	-	-	-	-	-	-	-	-	-	-	-	-		0	0	0	0		0	0	0	0	0	0	0	0	0	0
1	VFG043680(gi:112292705)	putative polyketide synthase [colibactin (TX033)] [Escherichia coli O18:K1:H7 str. IHE3034]	clbO	Toxin	100	-	-	-	-	-	-	-	-	-	-	-	-	-	-	-	-	-	-	-	-	-	-	-	-	-		0	0	0	0		0	0	0	0	0	0	0	0	0	0
1	VFG043681(gi:112292706)	putative non-ribosomal peptide synthetase [colibactin (TX033)] [Escherichia coli O18:K1:H7 str. IHE3034]	clbN	Toxin	99.954	-	-	-	-	-	-	-	-	-	-	-	-	-	-	-	-	-	-	-	-	-	-	-	-	-		0	0	0	0		0	0	0	0	0	0	0	0	0	0
1	VFG043682(gi:112292707)	putative drug/sodium antiporter [colibactin (TX033)] [Escherichia coli O18:K1:H7 str. IHE3034]	clbM	Toxin	100	-	-	-	-	-	-	-	-	-	-	-	-	-	-	-	-	-	-	-	-	-	-	-	-	-		0	0	0	0		0	0	0	0	0	0	0	0	0	0
1	VFG043683(gi:112292708)	putative amidase [colibactin (TX033)] [Escherichia coli O18:K1:H7 str. IHE3034]	clbL	Toxin	100	-	-	-	-	-	-	-	-	-	-	-	-	-	-	-	-	-	-	-	-	-	-	-	-	-		0	0	0	0		0	0	0	0	0	0	0	0	0	0
1	VFG043684(gi:112292709)	putative hybrid non-ribosomal peptide-polyketide synthetase [colibactin (TX033)] [Escherichia coli O18:K1:H7 str. IHE3034]	clbK	Toxin	99.985	-	-	-	-	-	-	-	-	-	-	-	-	-	-	-	-	-	-	-	-	-	-	-	-	-		0	0	0	0		0	0	0	0	0	0	0	0	0	0
1	VFG043685(gi:112292710)	putative non-ribosomal peptide synthase [colibactin (TX033)] [Escherichia coli O18:K1:H7 str. IHE3034]	clbJ	Toxin	100	-	-	-	-	-	-	-	-	-	-	-	-	-	-	-	-	-	-	-	-	-	-	-	-	-		0	0	0	0		0	0	0	0	0	0	0	0	0	0
1	VFG043686(gi:112292711)	putative polyketide synthase [colibactin (TX033)] [Escherichia coli O18:K1:H7 str. IHE3034]	clbI	Toxin	100	-	-	-	-	-	-	-	-	-	-	-	-	-	-	-	-	-	-	-	-	-	-	-	-	-		0	0	0	0		0	0	0	0	0	0	0	0	0	0
1	VFG043687(gi:112292712)	putative non-ribosomal peptide synthase [colibactin (TX033)] [Escherichia coli O18:K1:H7 str. IHE3034]	clbH	Toxin	99.937	-	-	-	-	-	-	-	-	-	-	-	-	-	-	-	-	-	-	-	-	-	-	-	-	-		0	0	0	0		0	0	0	0	0	0	0	0	0	0
1	VFG043688(gi:112292713)	putative malonyl-CoA transacylase [colibactin (TX033)] [Escherichia coli O18:K1:H7 str. IHE3034]	clbG	Toxin	100	-	-	-	-	-	-	-	-	-	-	-	-	-	-	-	-	-	-	-	-	-	-	-	-	-		0	0	0	0		0	0	0	0	0	0	0	0	0	0
1	VFG043689(gi:112292714)	putative acyl-CoA dehydrogenase [colibactin (TX033)] [Escherichia coli O18:K1:H7 str. IHE3034]	clbF	Toxin	99.646	-	-	-	-	-	-	-	-	-	-	-	-	-	-	-	-	-	-	-	-	-	-	-	-	-		0	0	0	0		0	0	0	0	0	0	0	0	0	0
1	VFG043690(gi:112292715)	putative D-alanyl carrier protein [colibactin (TX033)] [Escherichia coli O18:K1:H7 str. IHE3034]	clbE	Toxin	100	-	-	-	-	-	-	-	-	-	-	-	-	-	-	-	-	-	-	-	-	-	-	-	-	-		0	0	0	0		0	0	0	0	0	0	0	0	0	0
1	VFG043691(gi:112292716)	putative 3-hydroxyacyl-CoA dehydrogenase [colibactin (TX033)] [Escherichia coli O18:K1:H7 str. IHE3034]	clbD	Toxin	100	-	-	-	-	-	-	-	-	-	-	-	-	-	-	-	-	-	-	-	-	-	-	-	-	-		0	0	0	0		0	0	0	0	0	0	0	0	0	0
1	VFG043692(gi:112292717)	putative polyketide synthase [colibactin (TX033)] [Escherichia coli O18:K1:H7 str. IHE3034]	clbC	Toxin	100	-	-	-	-	-	-	-	-	-	-	-	-	-	-	-	-	-	-	-	-	-	-	-	-	-		0	0	0	0		0	0	0	0	0	0	0	0	0	0
1	VFG043693(gi:112292718)	putative hybrid polyketide-non-ribosomal peptide synthetase [colibactin (TX033)] [Escherichia coli O18:K1:H7 str. IHE3034]	clbB	Toxin	99.958	-	-	-	-	-	-	-	-	-	-	-	-	-	-	-	-	-	-	-	-	-	-	-	-	-		0	0	0	0		0	0	0	0	0	0	0	0	0	0
1	VFG043694(gi:112292719)	putative regulatory protein [colibactin (TX033)] [Escherichia coli O18:K1:H7 str. IHE3034]	clbR	Transcriptional Regulation	100	-	-	-	-	-	-	-	-	-	-	-	-	-	-	-	-	-	-	-	-	-	-	-	-	-		0	0	0	0		0	0	0	0	0	0	0	0	0	0
1	VFG043695(gi:112292720)	putative 4'-phosphopantetheinyl transferase [colibactin (TX033)] [Escherichia coli O18:K1:H7 str. IHE3034]	clbA	Toxin	100	-	-	-	-	-	-	-	-	-	-	-	-	-	-	-	-	-	-	-	-	-	-	-	-	-		0	0	0	0		0	0	0	0	0	0	0	0	0	0
1	VFG045464(gb|NP_754290)	Tir domain containing protein TcpC [TcpC (VF0413)] [Escherichia coli CFT073]	tcpC	Virulence effector	100	-	-	-	-	-	-	-	-	-	-	-	-	-	-	-	-	-	-	-	-	-	-	-	-	-		0	0	0	0		0	0	0	0	0	0	0	0	0	0
1	VFG046050	DraP [Afimbrial adhesin AFA-I (CVF823)] [Escherichia coli O25b:H4-ST131]	EC958_4098	Adherence	-	100	-	-	-	-	-	-	-	-	-	-	-	-	-	-	-	-	-	-	-	-	-	-	-	-		0	0	0	0		0	0	0	0	0	0	0	0	0	0
1	VFG046075	fimbrial subunit protein AfaD [Afimbrial adhesin AFA-I (CVF823)] [Escherichia coli VR50]	ECVR50_3235	Adherence	-	99.524	-	-	-	-	-	-	-	-	-	-	-	-	-	-	-	-	-	-	-	-	-	-	-	-		0	0	0	0		0	0	0	0	0	0	0	0	0	0
1	VFG046076	fimbrial usher protein AfaC [Afimbrial adhesin AFA-I (CVF823)] [Escherichia coli VR50]	ECVR50_3236	Adherence	-	99.574	-	-	-	-	-	-	-	-	-	-	-	-	-	-	-	-	-	-	-	-	-	-	-	-		0	0	0	0		0	0	0	0	0	0	0	0	0	0
1	VFG046077	fimbrial chaperone protein AfaB [Afimbrial adhesin AFA-I (CVF823)] [Escherichia coli VR50]	ECVR50_3237	Adherence	-	98.997	-	-	-	-	-	-	-	-	-	-	-	-	-	-	-	-	-	-	-	-	-	-	-	-		0	0	0	0		0	0	0	0	0	0	0	0	0	0
1	VFG046078	adhesin operon transcriptional regulator [Afimbrial adhesin AFA-I (CVF823)] [Escherichia coli VR50]	ECVR50_3238	Transcriptional Regulation	-	99.612	-	-	-	-	-	-	-	-	-	-	-	-	-	-	-	-	-	-	-	-	-	-	-	-		0	0	0	0		0	0	0	0	0	0	0	0	0	0
